# Supplementary material
Source: PubMed Central journal article supplement (PMC4782788)

---

# METAANALYTIC CLUSTERING OF THE INSULAR CORTEX

---

SUPPORTING ONLINE MATERIALS

---

## SUPPLEMENTARY TABLES

---

TAB S1 PAPERS INCLUDED IN THE METAANALYSIS

| <b>Author</b>    | <b>Year</b> | <b>Journal</b>                    |
|------------------|-------------|-----------------------------------|
| <b>Abe</b>       | 2008        | Cerebral Cortex                   |
| <b>Abel</b>      | 2003        | Human Brain Mapping               |
| <b>Abler</b>     | 2007        | Journal of Psychiatric Research   |
| <b>Abler</b>     | 2007        | Psychopharmacology                |
| <b>Abrahams</b>  | 2004        | Brain                             |
| <b>Abutalebi</b> | 2007        | Journal of Neuroscience           |
| <b>Achim</b>     | 2005        | Journal of Cognitive Neuroscience |
| <b>Achim</b>     | 2007        | Archives of General Psychiatry    |
| <b>Ackermann</b> | 2001        | Neuroreport                       |
| <b>Adcock</b>    | 2003        | NeuroImage                        |
| <b>Adcock</b>    | 2006        | Neuron                            |
| <b>Addis</b>     | 2006        | NeuroImage                        |
| <b>Adler</b>     | 1997        | Anesthesia and Analgesia          |
| <b>Ahrens</b>    | 2007        | Brain and Language                |
| <b>Akitsuki</b>  | 2003        | NeuroImage                        |
| <b>Aleman</b>    | 2008        | PLoS ONE                          |

|                   |      |                                                 |
|-------------------|------|-------------------------------------------------|
| <b>Alivisatos</b> | 1993 | Proceedings of the National Academy of Sciences |
| <b>Alivisatos</b> | 1997 | Neuropsychologia                                |
| <b>Allen</b>      | 2006 | Psychopharmacology                              |
| <b>Altmann</b>    | 2007 | NeuroImage                                      |
| <b>Altshuler</b>  | 2005 | Biological Psychiatry                           |
| <b>Altshuler</b>  | 2008 | Bipolar Disorders                               |
| <b>Anderson</b>   | 2000 | Journal of Cognitive Neuroscience               |
| <b>Anderson</b>   | 1994 | Brain                                           |
| <b>Andreasen</b>  | 1995 | American Journal of Psychiatry                  |
| <b>Andreasen</b>  | 1996 | Proceedings of the National Academy of Sciences |
| <b>Aoki</b>       | 2005 | Experimental Brain Research                     |
| <b>Aparicio</b>   | 2007 | NeuroImage                                      |
| <b>Aramaki</b>    | 2006 | Cerebral Cortex                                 |
| <b>Armony</b>     | 2001 | Neuroreport                                     |
| <b>Arnow</b>      | 2002 | Brain                                           |
| <b>Aron</b>       | 2004 | Journal of Neurophysiology                      |
| <b>Aron</b>       | 2005 | Journal of Neurophysiology                      |
| <b>Aron</b>       | 2006 | Journal of Neuroscience                         |
| <b>Arrington</b>  | 2000 | Journal of Cognitive Neuroscience               |
| <b>Ashwin</b>     | 2007 | Neuropsychologia                                |
| <b>Assaf</b>      | 2006 | Biological Psychiatry                           |
| <b>Assaf</b>      | 2006 | Psychiatry Research                             |
| <b>Audenaert</b>  | 2000 | European Journal of Nuclear Medicine            |
| <b>Audenaert</b>  | 2002 | Nuclear Medicine Communications                 |
| <b>Audoin</b>     | 2005 | Human Brain Mapping                             |
| <b>Awh</b>        | 1996 | Psychological Science                           |
| <b>Aziz</b>       | 2000 | Journal of Neuroscience                         |
| <b>Baciu</b>      | 2005 | European Journal of Radiology                   |
| <b>Baker</b>      | 1997 | Psychological Medicine                          |
| <b>Banich</b>     | 2000 | Journal of Cognitive Neuroscience               |
| <b>Banich</b>     | 2001 | Progress in Brain Research                      |
| <b>Bantick</b>    | 2002 | Brain                                           |
| <b>Barch</b>      | 2001 | Cerebral Cortex                                 |
| <b>Barch</b>      | 2002 | Journal of Abnormal Psychology                  |
| <b>Barnes</b>     | 2000 | Neuropsychologia                                |

|                    |      |                                       |
|--------------------|------|---------------------------------------|
| <b>Bartels</b>     | 2000 | Neuroreport                           |
| <b>Bartels</b>     | 2004 | NeuroImage                            |
| <b>Bartolo</b>     | 2006 | Journal of Cognitive Neuroscience     |
| <b>Basho</b>       | 2007 | Neuropsychologia                      |
| <b>Baumann</b>     | 2007 | Neuroreport                           |
| <b>Baumgartner</b> | 2006 | Brain Research                        |
| <b>Beauregard</b>  | 1997 | Journal of Cognitive Neuroscience     |
| <b>Beauregard</b>  | 1998 | Neuroreport                           |
| <b>Beauregard</b>  | 2006 | Neuroreport                           |
| <b>Beblo</b>       | 2006 | Psychological Medicine                |
| <b>Becerra</b>     | 1999 | Magnetic Resonance in Medicine        |
| <b>Becerra</b>     | 2001 | Neuron                                |
| <b>Beck</b>        | 2009 | Biological Psychiatry                 |
| <b>Becker</b>      | 1994 | Human Brain Mapping                   |
| <b>Bedwell</b>     | 2005 | International Journal of Neuroscience |
| <b>Belin</b>       | 2000 | Nature                                |
| <b>Belin</b>       | 1998 | Journal of Neuroscience               |
| <b>Belin</b>       | 2002 | Neuropsychologia                      |
| <b>Bellgrove</b>   | 2004 | Neuropsychologia                      |
| <b>Bench</b>       | 1993 | Neuropsychologia                      |
| <b>Beneventi</b>   | 2007 | Scandinavian Journal of Psychology    |
| <b>Bengtsson</b>   | 2005 | European Journal of Neuroscience      |
| <b>Bengtsson</b>   | 2001 | Neuroreport                           |
| <b>Benuzzi</b>     | 2007 | Brain Research Bulletin               |
| <b>Berman</b>      | 1995 | Neuropsychologia                      |
| <b>Berns</b>       | 2001 | Journal of Neuroscience               |
| <b>Bestmann</b>    | 2004 | European Journal of Neuroscience      |
| <b>Bestmann</b>    | 2005 | NeuroImage                            |
| <b>Bickel</b>      | 2009 | Journal of Neuroscience               |
| <b>Bilecen</b>     | 2002 | NeuroImage                            |
| <b>Binder</b>      | 1996 | Brain                                 |
| <b>Binder</b>      | 2003 | Journal of Cognitive Neuroscience     |
| <b>Binder</b>      | 2000 | Cerebral Cortex                       |
| <b>Bingel</b>      | 2003 | NeuroImage                            |
| <b>Binkofski</b>   | 1999 | European Journal of Neuroscience      |

|                        |      |                                                 |
|------------------------|------|-------------------------------------------------|
| <b>Bischoff-Grethe</b> | 2004 | Cognitive Brain Research                        |
| <b>Bjork</b>           | 2004 | Journal of Neuroscience                         |
| <b>Bjork</b>           | 2007 | Behavioural Brain Research                      |
| <b>Blair</b>           | 2006 | Journal of Neuroscience                         |
| <b>Blair</b>           | 2007 | NeuroImage                                      |
| <b>Blakemore</b>       | 1999 | NeuroImage                                      |
| <b>Blaxton</b>         | 1996 | Journal of Neuroscience                         |
| <b>Blinkenberg</b>     | 1996 | Journal of Cerebral Blood Flow and Metabolism   |
| <b>Blok</b>            | 1998 | Brain                                           |
| <b>Blood</b>           | 1999 | Nature Neuroscience                             |
| <b>Blood</b>           | 2001 | Proceedings of the National Academy of Sciences |
| <b>Bocher</b>          | 2001 | NeuroImage                                      |
| <b>Boecker</b>         | 1998 | Journal of Neurophysiology                      |
| <b>Boecker</b>         | 2002 | NeuroImage                                      |
| <b>Bohland</b>         | 2006 | NeuroImage                                      |
| <b>Bolla</b>           | 2005 | NeuroImage                                      |
| <b>Bolla</b>           | 2004 | Cerebral Cortex                                 |
| <b>Bonda</b>           | 1995 | Proceedings of the National Academy of Sciences |
| <b>Bonner-Jackson</b>  | 2005 | Biological Psychiatry                           |
| <b>Bonner-Jackson</b>  | 2007 | Biological Psychiatry                           |
| <b>Bookheimer</b>      | 2000 | Neurology                                       |
| <b>Bookheimer</b>      | 1995 | Human Brain Mapping                             |
| <b>Booth</b>           | 2002 | Human Brain Mapping                             |
| <b>Booth</b>           | 2002 | NeuroImage                                      |
| <b>Booth</b>           | 2004 | Journal of Cognitive Neuroscience               |
| <b>Bornhovd</b>        | 2002 | Brain                                           |
| <b>Botvinick</b>       | 2005 | NeuroImage                                      |
| <b>Brambati</b>        | 2006 | Brain Research                                  |
| <b>Brammer</b>         | 1997 | Magnetic Resonance Imaging                      |
| <b>Brannan</b>         | 2001 | Proceedings of the National Academy of Sciences |
| <b>Brass</b>           | 2002 | Cerebral Cortex                                 |
| <b>Braun</b>           | 1997 | Brain                                           |
| <b>Braver</b>          | 1997 | NeuroImage                                      |
| <b>Braver</b>          | 2001 | Cerebral Cortex                                 |
| <b>Braver</b>          | 2001 | NeuroImage                                      |

|                     |      |                                                         |
|---------------------|------|---------------------------------------------------------|
| <b>Braver</b>       | 2003 | Neuron                                                  |
| <b>Breitenstein</b> | 2005 | NeuroImage                                              |
| <b>Breiter</b>      | 2001 | Neuron                                                  |
| <b>Bremner</b>      | 2007 | Journal of Affective Disorders                          |
| <b>Britton</b>      | 2005 | Biological Psychiatry                                   |
| <b>Britton</b>      | 2006 | NeuroImage                                              |
| <b>Brody</b>        | 2001 | Archives of General Psychiatry                          |
| <b>Broome</b>       | 2009 | British Journal of Psychiatry                           |
| <b>Brown</b>        | 2008 | Cerebral Cortex                                         |
| <b>Brown</b>        | 1999 | Journal of the International Neuropsychological Society |
| <b>Brown</b>        | 2004 | Cognitive Brain Research                                |
| <b>Brown</b>        | 2005 | Human Brain Mapping                                     |
| <b>Brown</b>        | 2006 | European Journal of Neuroscience                        |
| <b>Brown</b>        | 2007 | Brain and Cognition                                     |
| <b>Brown</b>        | 2004 | Neuroreport                                             |
| <b>Brown</b>        | 2006 | NeuroImage                                              |
| <b>Brunia</b>       | 2000 | Experimental Brain Research                             |
| <b>Buchanan</b>     | 2000 | Cognitive Brain Research                                |
| <b>Buchel</b>       | 1998 | Neuron                                                  |
| <b>Buchel</b>       | 1999 | Journal of Neuroscience                                 |
| <b>Buckner</b>      | 1996 | Journal of Neuroscience                                 |
| <b>Buckner</b>      | 1998 | NeuroImage                                              |
| <b>Buckner</b>      | 2000 | Brain                                                   |
| <b>Budhani</b>      | 2007 | NeuroImage                                              |
| <b>Bueti</b>        | 2008 | Journal of Cognitive Neuroscience                       |
| <b>Bunge</b>        | 2001 | Brain                                                   |
| <b>Burianova</b>    | 2007 | Journal of Cognitive Neuroscience                       |
| <b>Burton</b>       | 1999 | Cerebral Cortex                                         |
| <b>Butler</b>       | 2007 | Neuroscience                                            |
| <b>Cabeza</b>       | 1997 | Neuroreport                                             |
| <b>Cabeza</b>       | 2002 | NeuroImage                                              |
| <b>Cabeza</b>       | 2003 | Journal of Cognitive Neuroscience                       |
| <b>Cabeza</b>       | 2003 | Neuropsychologia                                        |
| <b>Cairo</b>        | 2004 | Cognitive Brain Research                                |
| <b>Calarge</b>      | 2003 | American Journal of Psychiatry                          |

|                             |      |                                                 |
|-----------------------------|------|-------------------------------------------------|
| <b>Calautti</b>             | 2001 | Stroke                                          |
| <b>Calder</b>               | 2008 | European Journal of Neuroscience                |
| <b>Caldwell</b>             | 2005 | Behavioral Neuroscience                         |
| <b>Calhoun</b>              | 2004 | Human Brain Mapping                             |
| <b>Calhoun</b>              | 2006 | Human Brain Mapping                             |
| <b>Callan</b>               | 2006 | NeuroImage                                      |
| <b>Callicott</b>            | 1999 | Cerebral Cortex                                 |
| <b>Callicott</b>            | 2000 | Cerebral Cortex                                 |
| <b>Callicott</b>            | 2003 | American Journal of Psychiatry                  |
| <b>Calvert</b>              | 2003 | Journal of Cognitive Neuroscience               |
| <b>Camara</b>               | 2009 | Frontiers in Human Neuroscience                 |
| <b>Camchong</b>             | 2006 | Biological Psychiatry                           |
| <b>Campanella</b>           | 2001 | NeuroImage                                      |
| <b>Canli</b>                | 1998 | Neuroreport                                     |
| <b>Canli</b>                | 2002 | Proceedings of the National Academy of Sciences |
| <b>Canli</b>                | 2004 | Neuroreport                                     |
| <b>Canli</b>                | 2005 | Proceedings of the National Academy of Sciences |
| <b>Cannon</b>               | 2005 | Archives of General Psychiatry                  |
| <b>Cansino</b>              | 2002 | Cerebral Cortex                                 |
| <b>Capek</b>                | 2008 | Neuropsychologia                                |
| <b>Carlson</b>              | 1998 | Cerebral Cortex                                 |
| <b>Carlsson</b>             | 2000 | Journal of Cognitive Neuroscience               |
| <b>Carlsson</b>             | 2006 | NeuroImage                                      |
| <b>Carr</b>                 | 2003 | Proceedings of the National Academy of Sciences |
| <b>Carreiras</b>            | 2007 | Journal of Cognitive Neuroscience               |
| <b>Carter</b>               | 1995 | NeuroImage                                      |
| <b>Casey</b>                | 1998 | NeuroImage                                      |
| <b>Casey</b>                | 1996 | Journal of Neurophysiology                      |
| <b>Casey</b>                | 2001 | Journal of Neurophysiology                      |
| <b>Castriota-Scanderbeg</b> | 2005 | NeuroImage                                      |
| <b>Cato</b>                 | 2004 | Journal of Cognitive Neuroscience               |
| <b>Celsis</b>               | 1999 | NeuroImage                                      |
| <b>Chandrasekhar</b>        | 2008 | NeuroImage                                      |
| <b>Chang</b>                | 2004 | Archives of General Psychiatry                  |
| <b>Chang</b>                | 2006 | Brain                                           |

|                     |      |                                        |
|---------------------|------|----------------------------------------|
| <b>Chao</b>         | 2000 | NeuroImage                             |
| <b>Chee</b>         | 1999 | Journal of Neuroscience                |
| <b>Chee</b>         | 2001 | NeuroImage                             |
| <b>Chen</b>         | 2002 | Journal of Cognitive Neuroscience      |
| <b>Chen</b>         | 2004 | NeuroImage                             |
| <b>Chen</b>         | 2006 | Biological Psychiatry                  |
| <b>Cheng</b>        | 2007 | Current Biology                        |
| <b>Chikazoe</b>     | 2007 | Journal of Cognitive Neuroscience      |
| <b>Chochon</b>      | 1999 | Journal of Cognitive Neuroscience      |
| <b>Christoff</b>    | 2004 | Cortex                                 |
| <b>Christoffels</b> | 2007 | Human Brain Mapping                    |
| <b>Cilia</b>        | 2008 | Archives of Neurology                  |
| <b>Ciomas</b>       | 2008 | NeuroImage                             |
| <b>Clark</b>        | 2009 | Neuron                                 |
| <b>Coan</b>         | 2006 | Psychological Science                  |
| <b>Coderre</b>      | 2008 | Brain and Language                     |
| <b>Coghill</b>      | 1994 | Journal of Neuroscience                |
| <b>Coghill</b>      | 1999 | Journal of Neurophysiology             |
| <b>Coghill</b>      | 2001 | Journal of Neurophysiology             |
| <b>Cohen</b>        | 1997 | Nature                                 |
| <b>Cohen</b>        | 2000 | Brain                                  |
| <b>Cohen</b>        | 2003 | Cerebral Cortex                        |
| <b>Colebatch</b>    | 1991 | Journal of Neurophysiology             |
| <b>Cooke</b>        | 2002 | Human Brain Mapping                    |
| <b>Cools</b>        | 2004 | Journal of Neuroscience                |
| <b>Cooper</b>       | 2008 | NeuroImage                             |
| <b>Corbetta</b>     | 1991 | Journal of Neuroscience                |
| <b>Corbetta</b>     | 1998 | Neuron                                 |
| <b>Corbetta</b>     | 1990 | Science                                |
| <b>Corbetta</b>     | 1993 | Journal of Neuroscience                |
| <b>Corfield</b>     | 1999 | Journal of Applied Physiology          |
| <b>Cornier</b>      | 2007 | American Journal of Clinical Nutrition |
| <b>Coull</b>        | 2004 | Science                                |
| <b>Cowell</b>       | 2000 | NeuroImage                             |
| <b>Cox</b>          | 2005 | Journal of Neuroscience                |

|                |      |                                                   |
|----------------|------|---------------------------------------------------|
| Creem-Regehr   | 2007 | NeuroImage                                        |
| Creem-Regehr   | 2005 | Cognitive Brain Research                          |
| Crespo-Facorro | 1999 | American Journal of Psychiatry                    |
| Crespo-Facorro | 2001 | Human Brain Mapping                               |
| Crespo-Facorro | 2001 | Journal of American Medical Association           |
| Critchley      | 2004 | Nature Neuroscience                               |
| Critchley      | 2000 | Brain                                             |
| Critchley      | 2000 | Human Brain Mapping                               |
| Crivello       | 1995 | NeuroImage                                        |
| Cross          | 2007 | Journal of Cognitive Neuroscience                 |
| Crosson        | 1999 | Neuroreport                                       |
| Cunningham     | 2004 | Journal of Cognitive Neuroscience                 |
| Curtis         | 1998 | American Journal of Psychiatry                    |
| Curtis         | 1999 | Schizophrenia Research                            |
| Dade           | 2001 | NeuroImage                                        |
| Dalton         | 2005 | Journal of Cognitive Neuroscience                 |
| Damasio        | 1996 | Nature                                            |
| Damasio        | 2000 | Nature Neuroscience                               |
| Dannhauser     | 2008 | Cortex                                            |
| Dapretto       | 1999 | Neuron                                            |
| Dapretto       | 2006 | Nature Neuroscience                               |
| Daselaar       | 2003 | Neurobiology of Aging                             |
| Daselaar       | 2001 | NeuroImage                                        |
| Daselaar       | 2004 | NeuroImage                                        |
| Daselaar       | 2006 | Cerebral Cortex                                   |
| Daselaar       | 2006 | Journal of Neurophysiology                        |
| Dassonville    | 2001 | NeuroImage                                        |
| David          | 2006 | Journal of Cognitive Neuroscience                 |
| Davidson       | 2003 | American Journal of Psychiatry                    |
| de             | 1999 | Cognitive Brain Research                          |
| De             | 2000 | Journal of Speech, Language, and Hearing Research |
| De             | 2003 | Journal of Fluency Disorders                      |
| De             | 2003 | Journal of Neurolinguistics                       |
| de             | 2006 | Human Brain Mapping                               |
| de             | 2007 | Neuropsychologia                                  |



|                   |      |                                                                              |
|-------------------|------|------------------------------------------------------------------------------|
| <b>de</b>         | 2003 | European Journal of Neuroscience                                             |
| <b>de</b>         | 2003 | Journal of Neurophysiology                                                   |
| <b>de</b>         | 2004 | Journal of Neuroscience                                                      |
| <b>de</b>         | 2006 | Oral Surgery, Oral Medicine, Oral Pathology, Oral Radiology, and Endodontics |
| <b>Decety</b>     | 1994 | Nature                                                                       |
| <b>Deeley</b>     | 2007 | Biological Psychiatry                                                        |
| <b>Dehaene</b>    | 1999 | Science                                                                      |
| <b>Dehaene</b>    | 2001 | Nature Neuroscience                                                          |
| <b>Delazer</b>    | 2003 | Cognitive Brain Research                                                     |
| <b>Demonet</b>    | 1992 | Brain                                                                        |
| <b>Demonet</b>    | 1994 | Brain                                                                        |
| <b>Denkova</b>    | 2006 | Neuropsychologia                                                             |
| <b>Denslow</b>    | 2005 | Biological Psychiatry                                                        |
| <b>Denton</b>     | 1999 | Proceedings of the National Academy of Sciences                              |
| <b>Derbyshire</b> | 1997 | Pain                                                                         |
| <b>Derbyshire</b> | 1998 | Pain                                                                         |
| <b>Derbyshire</b> | 2002 | Journal of Pain                                                              |
| <b>Derbyshire</b> | 2002 | NeuroImage                                                                   |
| <b>Derrfuss</b>   | 2005 | Human Brain Mapping                                                          |
| <b>Desmond</b>    | 2003 | NeuroImage                                                                   |
| <b>Desmurget</b>  | 2001 | Journal of Neuroscience                                                      |
| <b>Desseilles</b> | 2006 | NeuroImage                                                                   |
| <b>Dettmers</b>   | 1995 | Journal of Neurophysiology                                                   |
| <b>Devlin</b>     | 2003 | Journal of Cognitive Neuroscience                                            |
| <b>Dichter</b>    | 2007 | NeuroImage                                                                   |
| <b>Dick</b>       | 2007 | Journal of Cognitive Neuroscience                                            |
| <b>Dickstein</b>  | 2007 | Bipolar Disorders                                                            |
| <b>DiGirolamo</b> | 2001 | Neuroreport                                                                  |
| <b>Dilger</b>     | 2003 | Neuroscience Letters                                                         |
| <b>Dillon</b>     | 2007 | Psychophysiology                                                             |
| <b>Dobbins</b>    | 2003 | Neuropsychologia                                                             |
| <b>Dolan</b>      | 1996 | NeuroImage                                                                   |
| <b>Dolan</b>      | 2000 | NeuroImage                                                                   |
| <b>Dolcos</b>     | 2004 | NeuroImage                                                                   |
| <b>Dougherty</b>  | 1999 | Biological Psychiatry                                                        |

|              |      |                                                 |
|--------------|------|-------------------------------------------------|
| Dove         | 2000 | Cognitive Brain Research                        |
| Drapier      | 2008 | Biological Psychiatry                           |
| Dreher       | 2003 | Cerebral Cortex                                 |
| Dresel       | 2005 | NeuroImage                                      |
| Dresel       | 2006 | Brain                                           |
| Drevets      | 1992 | Journal of Neuroscience                         |
| Drobyshevsky | 2006 | NeuroImage                                      |
| Druzgal      | 2001 | Cognitive Brain Research                        |
| Dunsmoor     | 2008 | NeuroImage                                      |
| Dupont       | 2002 | Surgical and Radiologic Anatomy                 |
| Duzel        | 1999 | Proceedings of the National Academy of Sciences |
| Duzel        | 2001 | Human Brain Mapping                             |
| Dziewas      | 2003 | NeuroImage                                      |
| Eddington    | 2007 | Journal of Cognitive Neuroscience               |
| Egan         | 2003 | Proceedings of the National Academy of Sciences |
| Ehrsson      | 2000 | European Journal of Neuroscience                |
| Ehrsson      | 2001 | Journal of Neurophysiology                      |
| Ehrsson      | 2003 | Journal of Neurophysiology                      |
| Eickhoff     | 2006 | Human Brain Mapping                             |
| Eickhoff     | 2006 | NeuroImage                                      |
| Eippert      | 2007 | Human Brain Mapping                             |
| Eldridge     | 2000 | Nature Neuroscience                             |
| Ellermann    | 1998 | Journal of Magnetic Resonance                   |
| Elliott      | 2004 | NeuroImage                                      |
| Elliott      | 1997 | Neuropsychologia                                |
| Elliott      | 1998 | Psychological Medicine                          |
| Elliott      | 2000 | Journal of Neuroscience                         |
| Elliott      | 2002 | Archives of General Psychiatry                  |
| Elliott      | 2003 | Journal of Neuroscience                         |
| Elliott      | 2004 | Biological Psychiatry                           |
| Engelmann    | 2009 | PLoS ONE                                        |
| Ernst        | 2004 | Neuropsychologia                                |
| Ernst        | 2005 | NeuroImage                                      |
| Etard        | 2000 | Neuroreport                                     |
| Ethofer      | 2006 | Neuroreport                                     |

|                         |      |                                                 |
|-------------------------|------|-------------------------------------------------|
| <b>Ettinger</b>         | 2008 | Cerebral Cortex                                 |
| <b>Evans</b>            | 1999 | Journal of Physiology                           |
| <b>Ewbank</b>           | 2009 | NeuroImage                                      |
| <b>Eyler</b>            | 2004 | Psychiatry Research                             |
| <b>Eyler</b>            | 2008 | Psychiatry Research                             |
| <b>Falconer</b>         | 2008 | Journal of Psychiatry and Neuroscience          |
| <b>Fan</b>              | 2003 | NeuroImage                                      |
| <b>Farrell</b>          | 2006 | Proceedings of the National Academy of Sciences |
| <b>Fassbender</b>       | 2004 | Cognitive Brain Research                        |
| <b>Fehr</b>             | 2007 | Brain Research                                  |
| <b>Fenker</b>           | 2005 | European Journal of Neuroscience                |
| <b>Ferrandez</b>        | 2003 | NeuroImage                                      |
| <b>Ferrarelli</b>       | 2004 | Brain Research Bulletin                         |
| <b>Ferretti</b>         | 2005 | NeuroImage                                      |
| <b>Ferstl</b>           | 2001 | Cognitive Brain Research                        |
| <b>Ferstl</b>           | 2007 | Neuroscience Letters                            |
| <b>Feusner</b>          | 2007 | Archives of General Psychiatry                  |
| <b>Fiebach</b>          | 2002 | Journal of Cognitive Neuroscience               |
| <b>Fiebach</b>          | 2005 | Human Brain Mapping                             |
| <b>Fiez</b>             | 1996 | Journal of Neuroscience                         |
| <b>Fiez</b>             | 1999 | Neuron                                          |
| <b>Fiez</b>             | 1995 | Journal of Cognitive Neuroscience               |
| <b>Filimon</b>          | 2007 | NeuroImage                                      |
| <b>Finger</b>           | 2006 | NeuroImage                                      |
| <b>Fitzgerald</b>       | 2005 | Biological Psychiatry                           |
| <b>Fitzgerald</b>       | 2008 | Human Brain Mapping                             |
| <b>Fitzgerald</b>       | 2004 | Neuroscience Letters                            |
| <b>Fletcher</b>         | 1996 | Brain                                           |
| <b>Fletcher</b>         | 1998 | Archives of General Psychiatry                  |
| <b>Fliessbach</b>       | 2006 | NeuroImage                                      |
| <b>Flores-Gutierrez</b> | 2007 | International Journal of Psychophysiology       |
| <b>Floyer-Lea</b>       | 2005 | Journal of Neurophysiology                      |
| <b>Foland</b>           | 2008 | Psychiatry Research                             |
| <b>Fossati</b>          | 2003 | American Journal of Psychiatry                  |
| <b>Fox</b>              | 2000 | Brain                                           |

|                     |      |                                                                           |
|---------------------|------|---------------------------------------------------------------------------|
| <b>Fox</b>          | 1996 | Nature                                                                    |
| <b>Fox</b>          | 2001 | NeuroImage                                                                |
| <b>Fox</b>          | 2002 | Human Brain Mapping                                                       |
| <b>Fox</b>          | 1987 | Journal of Neurosurgery                                                   |
| <b>Fox</b>          | 1997 | Neuroreport                                                               |
| <b>Francis</b>      | 1999 | Neuroreport                                                               |
| <b>Frangou</b>      | 2008 | European Psychiatry                                                       |
| <b>Frankenstein</b> | 2001 | NeuroImage                                                                |
| <b>Fraser</b>       | 2002 | Neuron                                                                    |
| <b>Friston</b>      | 1995 | NeuroImage                                                                |
| <b>Frith</b>        | 1991 | Proceedings of the Royal Society of London. Series B. Biological Sciences |
| <b>Fritsche</b>     | 2006 | NeuroImage                                                                |
| <b>Fu</b>           | 2002 | NeuroImage                                                                |
| <b>Fu</b>           | 2005 | American Journal of Psychiatry                                            |
| <b>Fu</b>           | 2006 | Cerebral Cortex                                                           |
| <b>Fu</b>           | 2004 | Archives of General Psychiatry                                            |
| <b>Fujii</b>        | 2002 | NeuroImage                                                                |
| <b>Gagnon</b>       | 2002 | Brain                                                                     |
| <b>Gaillard</b>     | 2003 | Human Brain Mapping                                                       |
| <b>Galati</b>       | 2008 | NeuroImage                                                                |
| <b>Galvan</b>       | 2007 | Developmental Science                                                     |
| <b>Gamer</b>        | 2007 | Human Brain Mapping                                                       |
| <b>Gandour</b>      | 2003 | Human Brain Mapping                                                       |
| <b>Ganguli</b>      | 1997 | Biological Psychiatry                                                     |
| <b>Garavan</b>      | 2003 | NeuroImage                                                                |
| <b>Garavan</b>      | 1999 | Proceedings of the National Academy of Sciences                           |
| <b>Garavan</b>      | 2000 | Cerebral Cortex                                                           |
| <b>Garavan</b>      | 2000 | Microscopy Research and Technique                                         |
| <b>Garavan</b>      | 2002 | NeuroImage                                                                |
| <b>Garraux</b>      | 2005 | Journal of Neuroscience                                                   |
| <b>Gavazzi</b>      | 2007 | Journal of Computer Assisted Tomography                                   |
| <b>Gelnar</b>       | 1999 | NeuroImage                                                                |
| <b>George</b>       | 1994 | Human Brain Mapping                                                       |
| <b>George</b>       | 1995 | American Journal of Psychiatry                                            |
| <b>George</b>       | 1996 | Biological Psychiatry                                                     |

|                             |      |                                                      |
|-----------------------------|------|------------------------------------------------------|
| <b>George</b>               | 1993 | Journal of Neuropsychiatry and Clinical Neuroscience |
| <b>Georgiewa</b>            | 1999 | Neuroreport                                          |
| <b>Georgiou-Karistianis</b> | 2007 | Neuropsychologia                                     |
| <b>Gerardin</b>             | 2000 | Cerebral Cortex                                      |
| <b>Gerardin</b>             | 2003 | Cerebral Cortex                                      |
| <b>German</b>               | 2004 | Journal of Cognitive Neuroscience                    |
| <b>Geuze</b>                | 2007 | Archives of General Psychiatry                       |
| <b>Ghatan</b>               | 1995 | NeuroImage                                           |
| <b>Ghatan</b>               | 1998 | NeuroImage                                           |
| <b>Ghosh</b>                | 2008 | Journal of Speech, Language, and Hearing Research    |
| <b>Giesbrecht</b>           | 2003 | NeuroImage                                           |
| <b>Gitelman</b>             | 1999 | Brain                                                |
| <b>Gitelman</b>             | 2002 | NeuroImage                                           |
| <b>Gizewski</b>             | 2007 | NeuroImage                                           |
| <b>Gizewski</b>             | 2006 | Experimental Brain Research                          |
| <b>Glahn</b>                | 2005 | Human Brain Mapping                                  |
| <b>Gobbini</b>              | 2007 | Journal of Cognitive Neuroscience                    |
| <b>Goekoop</b>              | 2006 | Neuropsychopharmacology                              |
| <b>Goerres</b>              | 1998 | Neuroreport                                          |
| <b>Goldberg</b>             | 1998 | NeuroImage                                           |
| <b>Goldin</b>               | 2005 | NeuroImage                                           |
| <b>Goldin</b>               | 2008 | Biological Psychiatry                                |
| <b>Goldstein</b>            | 2007 | American Journal of Psychiatry                       |
| <b>Golestani</b>            | 2006 | Neuropsychologia                                     |
| <b>Gomot</b>                | 2008 | Brain                                                |
| <b>Goossens</b>             | 2007 | Psychiatry Research                                  |
| <b>Gorno-Tempini</b>        | 2001 | NeuroImage                                           |
| <b>Gotlib</b>               | 2005 | Neuroreport                                          |
| <b>Gould</b>                | 2003 | NeuroImage                                           |
| <b>Gowen</b>                | 2007 | NeuroImage                                           |
| <b>Grady</b>                | 2001 | NeuroImage                                           |
| <b>Grady</b>                | 1998 | Proceedings of the National Academy of Sciences      |
| <b>Grafton</b>              | 1992 | Journal of Neuroscience                              |
| <b>Grafton</b>              | 1996 | Experimental Brain Research                          |
| <b>Grandjean</b>            | 2005 | Nature Neuroscience                                  |

|                  |      |                                                 |
|------------------|------|-------------------------------------------------|
| <b>Grasby</b>    | 1994 | Brain                                           |
| <b>Grezes</b>    | 2004 | Journal of Neuroscience                         |
| <b>Grezes</b>    | 2002 | Neuropsychologia                                |
| <b>Griffiths</b> | 2005 | Journal of Urology                              |
| <b>Griffiths</b> | 1994 | Current Biology                                 |
| <b>Griffiths</b> | 1998 | Nature Neuroscience                             |
| <b>Griffiths</b> | 1999 | NeuroImage                                      |
| <b>Griffiths</b> | 2000 | Human Brain Mapping                             |
| <b>Grimm</b>     | 2006 | NeuroImage                                      |
| <b>Grosbras</b>  | 2006 | Cerebral Cortex                                 |
| <b>Gruber</b>    | 2003 | NeuroImage                                      |
| <b>Gruber</b>    | 2009 | Human Brain Mapping                             |
| <b>Gu</b>        | 2007 | NeuroImage                                      |
| <b>Guillot</b>   | 2008 | Human Brain Mapping                             |
| <b>Gur</b>       | 2007 | Human Brain Mapping                             |
| <b>Gurd</b>      | 2002 | Brain                                           |
| <b>Guroglu</b>   | 2008 | NeuroImage                                      |
| <b>Gusnard</b>   | 2003 | Proceedings of the National Academy of Sciences |
| <b>Haase</b>     | 2007 | Journal of Neuroscience Methods                 |
| <b>Habel</b>     | 2005 | NeuroImage                                      |
| <b>Hagen</b>     | 2002 | European Journal of Neuroscience                |
| <b>Hagen</b>     | 2002 | Journal of Neurophysiology                      |
| <b>Hagoort</b>   | 1999 | Journal of Cognitive Neuroscience               |
| <b>Hall</b>      | 2004 | Neuroreport                                     |
| <b>Hall</b>      | 2003 | American Journal of Psychiatry                  |
| <b>Haller</b>    | 2005 | Neuropsychologia                                |
| <b>Haller</b>    | 2007 | European Journal of Neuroscience                |
| <b>Halpern</b>   | 1999 | Cerebral Cortex                                 |
| <b>Halsband</b>  | 1998 | Behavioural Brain Research                      |
| <b>Halsband</b>  | 2002 | Behavioural Brain Research                      |
| <b>Hamdy</b>     | 1999 | American Journal of Physiology                  |
| <b>Hamdy</b>     | 1999 | Journal of Neurophysiology                      |
| <b>Hamilton</b>  | 2009 | Human Brain Mapping                             |
| <b>Hamzei</b>    | 2003 | NeuroImage                                      |
| <b>Hanakawa</b>  | 2003 | Journal of Neurophysiology                      |

|                     |      |                                                 |
|---------------------|------|-------------------------------------------------|
| <b>Hanakawa</b>     | 2008 | Cerebral Cortex                                 |
| <b>Hao</b>          | 2005 | Neuroscience Letters                            |
| <b>Harenski</b>     | 2006 | NeuroImage                                      |
| <b>Hariri</b>       | 2000 | Neuroreport                                     |
| <b>Hariri</b>       | 2003 | Biological Psychiatry                           |
| <b>Harrington</b>   | 2007 | Human Brain Mapping                             |
| <b>Harris</b>       | 2005 | Journal of Cerebral Blood Flow and Metabolism   |
| <b>Hart</b>         | 2004 | Human Brain Mapping                             |
| <b>Haslinger</b>    | 2004 | Human Brain Mapping                             |
| <b>Hauk</b>         | 2009 | European Journal of Neuroscience                |
| <b>Hautzel</b>      | 2002 | Neuroscience Letters                            |
| <b>Heckers</b>      | 1998 | Nature Neuroscience                             |
| <b>Heckers</b>      | 2004 | American Journal of Psychiatry                  |
| <b>Heim</b>         | 2002 | Neuroscience Letters                            |
| <b>Henke</b>        | 1999 | Proceedings of the National Academy of Sciences |
| <b>Henke</b>        | 1997 | Hippocampus                                     |
| <b>Hennenlotter</b> | 2005 | NeuroImage                                      |
| <b>Henson</b>       | 1999 | Journal of Neuroscience                         |
| <b>Henson</b>       | 2002 | NeuroImage                                      |
| <b>Herbster</b>     | 1997 | Human Brain Mapping                             |
| <b>Herpertz</b>     | 2008 | Journal of Child Psychology and Psychiatry      |
| <b>Herrmann</b>     | 2001 | Human Brain Mapping                             |
| <b>Herwig</b>       | 2007 | NeuroImage                                      |
| <b>Herwig</b>       | 2007 | Psychiatry Research                             |
| <b>Hester</b>       | 2004 | Journal of Cognitive Neuroscience               |
| <b>Hirshorn</b>     | 2006 | Neuropsychologia                                |
| <b>Hlushchuk</b>    | 2006 | Journal of Neuroscience                         |
| <b>Hobday</b>       | 2001 | Brain                                           |
| <b>Hoeft</b>        | 2006 | Journal of Neuroscience                         |
| <b>Hofer</b>        | 2003 | American Journal of Psychiatry                  |
| <b>Hofer</b>        | 2007 | Brain and Cognition                             |
| <b>Hoffman</b>      | 2008 | Psychopharmacology                              |
| <b>Holland</b>      | 2005 | American Journal of Psychiatry                  |
| <b>Holsen</b>       | 2005 | NeuroImage                                      |
| <b>Honey</b>        | 1999 | Proceedings of the National Academy of Sciences |

|                  |      |                                                 |
|------------------|------|-------------------------------------------------|
| <b>Honey</b>     | 2003 | Psychological Medicine                          |
| <b>Hopfinger</b> | 2000 | Nature Neuroscience                             |
| <b>Horn</b>      | 2003 | Neuropsychologia                                |
| <b>Horovitz</b>  | 2002 | Magnetic Resonance Imaging                      |
| <b>Hou</b>       | 2007 | Brain Research                                  |
| <b>Howard</b>    | 1992 | Brain                                           |
| <b>Huettel</b>   | 2006 | Neuron                                          |
| <b>Huh</b>       | 2008 | Journal of Sexual Medicine                      |
| <b>Hui</b>       | 2000 | Human Brain Mapping                             |
| <b>Hui</b>       | 2005 | NeuroImage                                      |
| <b>Hummel</b>    | 2007 | Behavioural Brain Research                      |
| <b>Husain</b>    | 2006 | Human Brain Mapping                             |
| <b>Husain</b>    | 2006 | Neuroreport                                     |
| <b>Huss</b>      | 2008 | NeuroImage                                      |
| <b>Hutchison</b> | 2008 | NeuroImage                                      |
| <b>Iadarola</b>  | 1998 | Brain                                           |
| <b>Iaria</b>     | 2008 | Human Brain Mapping                             |
| <b>Ibinson</b>   | 2004 | Anesthesiology                                  |
| <b>Iidaka</b>    | 2000 | Journal of Cognitive Neuroscience               |
| <b>Ilg</b>       | 2007 | NeuroImage                                      |
| <b>Imaizumi</b>  | 1997 | Neuroreport                                     |
| <b>Indovina</b>  | 2001 | Experimental Brain Research                     |
| <b>Ingham</b>    | 2000 | Brain and Language                              |
| <b>Ino</b>       | 2004 | Brain Research Bulletin                         |
| <b>Ino</b>       | 2008 | Brain Research Bulletin                         |
| <b>Isaev</b>     | 2002 | Journal of Physiology                           |
| <b>Ischebeck</b> | 2004 | Journal of Cognitive Neuroscience               |
| <b>Ischebeck</b> | 2006 | NeuroImage                                      |
| <b>Iseki</b>     | 2008 | NeuroImage                                      |
| <b>Isenberg</b>  | 1999 | Proceedings of the National Academy of Sciences |
| <b>Ishai</b>     | 2000 | Neuron                                          |
| <b>Ito</b>       | 1996 | Journal of Nuclear Medicine                     |
| <b>Ito</b>       | 2002 | NeuroImage                                      |
| <b>Iwase</b>     | 2002 | NeuroImage                                      |
| <b>Jabbi</b>     | 2007 | NeuroImage                                      |



|                     |      |                                    |
|---------------------|------|------------------------------------|
| <b>Jackson</b>      | 2004 | NeuroImage                         |
| <b>Jackson</b>      | 2005 | NeuroImage                         |
| <b>Jackson</b>      | 2006 | Neuropsychologia                   |
| <b>Jacobsen</b>     | 2004 | Biological Psychiatry              |
| <b>Jacobsen</b>     | 2006 | NeuroImage                         |
| <b>Jager</b>        | 2006 | Psychopharmacology                 |
| <b>Jahanshahi</b>   | 2006 | Journal of Neuroscience            |
| <b>Janata</b>       | 2009 | Cerebral Cortex                    |
| <b>Jancke</b>       | 2000 | Cognitive Brain Research           |
| <b>Jancke</b>       | 1998 | Neuropsychologia                   |
| <b>Jardri</b>       | 2007 | NeuroImage                         |
| <b>Jeffries</b>     | 2003 | Neuroreport                        |
| <b>Jenkins</b>      | 1994 | Journal of Neuroscience            |
| <b>Jensen</b>       | 2003 | Neuron                             |
| <b>Jernigan</b>     | 1998 | NeuroImage                         |
| <b>Jimura</b>       | 2004 | NeuroImage                         |
| <b>Jobard</b>       | 2007 | NeuroImage                         |
| <b>Johnson</b>      | 2002 | NeuroImage                         |
| <b>Johnson</b>      | 2007 | Cerebral Cortex                    |
| <b>Johnson</b>      | 2006 | Biological Psychiatry              |
| <b>Johnson-Frey</b> | 2005 | Cerebral Cortex                    |
| <b>Joliot</b>       | 1998 | NeuroImage                         |
| <b>Jones</b>        | 1997 | Annals of the Rheumatic Diseases   |
| <b>Jonides</b>      | 1997 | Journal of Cognitive Neuroscience  |
| <b>Juckel</b>       | 2008 | Neuropsychologia                   |
| <b>Juckel</b>       | 2006 | NeuroImage                         |
| <b>Jueptner</b>     | 1997 | NeuroImage                         |
| <b>Just</b>         | 2001 | Journal of Experimental Psychology |
| <b>Just</b>         | 2004 | NeuroImage                         |
| <b>Kaladjian</b>    | 2009 | Bipolar Disorders                  |
| <b>Kaladjian</b>    | 2009 | Psychiatry Research                |
| <b>Kang</b>         | 1999 | NeuroImage                         |
| <b>Kapur</b>        | 1994 | Neuroreport                        |
| <b>Kapur</b>        | 1996 | Journal of Cognitive Neuroscience  |
| <b>Karama</b>       | 2002 | Human Brain Mapping                |

|                    |      |                                                           |
|--------------------|------|-----------------------------------------------------------|
| <b>Katzir</b>      | 2005 | NeuroImage                                                |
| <b>Kawashima</b>   | 2000 | Journal of Neurophysiology                                |
| <b>Kawashima</b>   | 2000 | NeuroImage                                                |
| <b>Kawashima</b>   | 1996 | Brain Research                                            |
| <b>Kawashima</b>   | 1998 | Experimental Brain Research                               |
| <b>Keedwell</b>    | 2005 | Biological Psychiatry                                     |
| <b>Keedy</b>       | 2009 | Psychiatry Research                                       |
| <b>Keightley</b>   | 2007 | Social Cognitive and Affective Neuroscience               |
| <b>Kelley</b>      | 1998 | Neuron                                                    |
| <b>Kelley</b>      | 2002 | Journal of Cognitive Neuroscience                         |
| <b>Kelly</b>       | 2004 | European Journal of Neuroscience                          |
| <b>Kemeny</b>      | 2005 | Human Brain Mapping                                       |
| <b>Kensinger</b>   | 2006 | Journal of Neuroscience                                   |
| <b>Kensinger</b>   | 2007 | Neuropsychologia                                          |
| <b>Kerns</b>       | 2005 | American Journal of Psychiatry                            |
| <b>Kerr</b>        | 2004 | Neuroreport                                               |
| <b>Kerrison</b>    | 2003 | American Journal of Ophthalmology                         |
| <b>Kesler-West</b> | 2001 | Cognitive Brain Research                                  |
| <b>Kiehl</b>       | 2000 | Psychophysiology                                          |
| <b>Kiehl</b>       | 2002 | NeuroImage                                                |
| <b>Kiehl</b>       | 2001 | Schizophrenia Research                                    |
| <b>Kikuchi</b>     | 2005 | Neuroreport                                               |
| <b>Kikyo</b>       | 2004 | NeuroImage                                                |
| <b>Killgore</b>    | 2003 | NeuroImage                                                |
| <b>Kim</b>         | 2000 | American Journal of Psychiatry                            |
| <b>Kim</b>         | 2002 | European Archives of Psychiatry and Clinical Neuroscience |
| <b>Kim</b>         | 2002 | NeuroImage                                                |
| <b>Kim</b>         | 2006 | PLoS Biology                                              |
| <b>Kim</b>         | 2006 | International Journal of Impotence Research               |
| <b>Kim</b>         | 1999 | NeuroImage                                                |
| <b>Kimbrell</b>    | 2002 | Biological Psychiatry                                     |
| <b>Kimbrell</b>    | 1999 | Biological Psychiatry                                     |
| <b>Kircher</b>     | 2000 | Neuroreport                                               |
| <b>Kircher</b>     | 2002 | Neuropsychologia                                          |
| <b>Kircher</b>     | 2004 | NeuroImage                                                |

|                |      |                                                      |
|----------------|------|------------------------------------------------------|
| Kirsch         | 2006 | Neuroscience Letters                                 |
| Kirsch         | 2003 | NeuroImage                                           |
| Kirschen       | 2005 | NeuroImage                                           |
| Kitada         | 2003 | Neuroreport                                          |
| Kitada         | 2005 | NeuroImage                                           |
| Kleber         | 2007 | NeuroImage                                           |
| Klein          | 1995 | Proceedings of the National Academy of Sciences      |
| Klein          | 2001 | NeuroImage                                           |
| Knecht         | 2003 | NeuroImage                                           |
| Knutson        | 2006 | Social Neuroscience                                  |
| Knutson        | 2000 | NeuroImage                                           |
| Knutson        | 2001 | Journal of Neuroscience                              |
| Knutson        | 2001 | Neuroreport                                          |
| Knutson        | 2003 | NeuroImage                                           |
| Knutson        | 2004 | Neuron                                               |
| Knutson        | 2005 | Journal of Neuroscience                              |
| Knutson        | 2008 | Biological Psychiatry                                |
| Kobayashi      | 2007 | Neuropsychologia                                     |
| Kobayashi      | 2004 | NeuroImage                                           |
| Koch           | 2007 | Neuroscience                                         |
| Koelsch        | 2002 | NeuroImage                                           |
| Koeneke        | 2008 | Behavioral and Brain Functions                       |
| Konen          | 2004 | NeuroImage                                           |
| Konishi        | 1998 | European Journal of Neuroscience                     |
| Konishi        | 2002 | Proceedings of the National Academy of Sciences      |
| Konishi        | 2003 | Journal of Neuroscience                              |
| Koppelstaetter | 2008 | NeuroImage                                           |
| Koshino        | 2008 | Cerebral Cortex                                      |
| Koski          | 2002 | Cerebral Cortex                                      |
| Kosslyn        | 1998 | Psychophysiology                                     |
| Kosslyn        | 1996 | Neuroreport                                          |
| Kotz           | 2003 | Brain and Language                                   |
| Kozel          | 2004 | Behavioral Neuroscience                              |
| Kozel          | 2004 | Journal of Neuropsychiatry and Clinical Neuroscience |
| Kozel          | 2005 | Biological Psychiatry                                |

|                        |      |                                                  |
|------------------------|------|--------------------------------------------------|
| <b>Kramer</b>          | 2007 | NeuroImage                                       |
| <b>Kranz</b>           | 2006 | Current Biology                                  |
| <b>Krausz</b>          | 2007 | International Journal of Neuropsychopharmacology |
| <b>Kraut</b>           | 2006 | Journal of Cognitive Neuroscience                |
| <b>Kroger</b>          | 2002 | Cerebral Cortex                                  |
| <b>Kroliczak</b>       | 2007 | Journal of Neurophysiology                       |
| <b>Kronhaus</b>        | 2006 | Bipolar Disorders                                |
| <b>Kubicki</b>         | 2003 | NeuroImage                                       |
| <b>Kuchinke</b>        | 2005 | NeuroImage                                       |
| <b>Kuhtz-Buschbeck</b> | 2003 | European Journal of Neuroscience                 |
| <b>Kuhtz-Buschbeck</b> | 2005 | Journal of Urology                               |
| <b>Kulkami</b>         | 2005 | European Journal of Neuroscience                 |
| <b>Kumari</b>          | 2003 | Biological Psychiatry                            |
| <b>Kumari</b>          | 2006 | Schizophrenia Research                           |
| <b>Kumari</b>          | 2003 | Psychiatry Research                              |
| <b>Kumari</b>          | 2009 | Schizophrenia Bulletin                           |
| <b>Kuo</b>             | 2001 | Neuroreport                                      |
| <b>Kuo</b>             | 2003 | NeuroImage                                       |
| <b>Kuo</b>             | 2004 | NeuroImage                                       |
| <b>Kuperberg</b>       | 2000 | Journal of Cognitive Neuroscience                |
| <b>LaBar</b>           | 1998 | Neuron                                           |
| <b>LaBar</b>           | 1999 | NeuroImage                                       |
| <b>Lacourse</b>        | 2005 | NeuroImage                                       |
| <b>Ladurner</b>        | 2006 | Social Neuroscience                              |
| <b>Lagopoulos</b>      | 2007 | Journal of Psychiatry and Neuroscience           |
| <b>Lagopoulos</b>      | 2007 | Neuroreport                                      |
| <b>Lai</b>             | 2009 | Neuroscience Letters                             |
| <b>Lamm</b>            | 2007 | Journal of Cognitive Neuroscience                |
| <b>Landau</b>          | 2004 | NeuroImage                                       |
| <b>Lane</b>            | 1997 | Neuropsychologia                                 |
| <b>Lane</b>            | 1997 | Neuroreport                                      |
| <b>Lane</b>            | 1999 | Neuropsychologia                                 |
| <b>Langheim</b>        | 2002 | NeuroImage                                       |
| <b>Langleben</b>       | 2005 | Human Brain Mapping                              |
| <b>Lanius</b>          | 2002 | Biological Psychiatry                            |

|            |      |                                                              |
|------------|------|--------------------------------------------------------------|
| Lanius     | 2003 | Biological Psychiatry                                        |
| Lanius     | 2004 | American Journal of Psychiatry                               |
| Lanius     | 2005 | Biological Psychiatry                                        |
| Lanius     | 2007 | Psychiatry Research                                          |
| Larsson    | 1996 | Neuroreport                                                  |
| Laurens    | 2005 | Schizophrenia Research                                       |
| Laureys    | 2000 | Brain                                                        |
| Law        | 1997 | Acta Physiologica Scandinavica                               |
| Lawrence   | 2004 | Biological Psychiatry                                        |
| Lawrence   | 2006 | NeuroImage                                                   |
| Lawrence   | 2007 | Biological Psychiatry                                        |
| Lazeron    | 2003 | Journal of the Neurological Sciences                         |
| Le         | 2000 | NeuroImage                                                   |
| Lee        | 2005 | Human Brain Mapping                                          |
| Lee        | 2006 | Social Cognitive and Affective Neuroscience                  |
| Lee        | 2007 | Brain                                                        |
| Lee        | 2008 | Cerebral Cortex                                              |
| Lee        | 2009 | Brain and Cognition                                          |
| Lee        | 2004 | Cognitive Behavioral Neurology                               |
| Lee        | 2007 | Progress In Neuro-Psychopharmacology & Biological Psychiatry |
| Leff       | 2008 | Journal of Neuroscience                                      |
| Lehericy   | 2006 | Cerebral Cortex                                              |
| Leibenluft | 2004 | Biological Psychiatry                                        |
| Lennox     | 2004 | Psychological Medicine                                       |
| Lepage     | 2006 | Biological Psychiatry                                        |
| Lepage     | 2001 | NeuroImage                                                   |
| Lerner     | 2004 | NeuroImage                                                   |
| Leslie     | 2004 | NeuroImage                                                   |
| Leung      | 2000 | Cerebral Cortex                                              |
| Leung      | 2002 | Journal of Cognitive Neuroscience                            |
| Leveroni   | 2000 | Journal of Neuroscience                                      |
| Levine     | 2004 | Journal of Cognitive Neuroscience                            |
| Li         | 2008 | Neuroscience                                                 |
| Li         | 2003 | Neuroreport                                                  |
| Liddle     | 2001 | Human Brain Mapping                                          |

|                   |      |                                  |
|-------------------|------|----------------------------------|
| <b>Liotti</b>     | 2000 | Biological Psychiatry            |
| <b>Lissek</b>     | 2007 | NeuroImage                       |
| <b>Lissek</b>     | 2008 | PLoS ONE                         |
| <b>Little</b>     | 2006 | Brain and Cognition              |
| <b>Liu</b>        | 2004 | NeuroImage                       |
| <b>Liu</b>        | 2007 | Human Brain Mapping              |
| <b>Liu</b>        | 2008 | NeuroImage                       |
| <b>Liu</b>        | 2007 | Journal of Neuroscience          |
| <b>Livesey</b>    | 2007 | Neuropsychologia                 |
| <b>Lockwood</b>   | 1999 | Cerebral Cortex                  |
| <b>LoPresti</b>   | 2008 | Journal of Neuroscience          |
| <b>Lorberbaum</b> | 2004 | Neuroreport                      |
| <b>Lorenz</b>     | 2002 | Neuron                           |
| <b>Lotze</b>      | 2001 | NeuroImage                       |
| <b>Lowell</b>     | 2008 | NeuroImage                       |
| <b>Luke</b>       | 2002 | Human Brain Mapping              |
| <b>Luks</b>       | 2002 | NeuroImage                       |
| <b>Lumer</b>      | 1998 | Science                          |
| <b>Lurito</b>     | 2000 | Human Brain Mapping              |
| <b>Lutz</b>       | 2000 | Neuroreport                      |
| <b>MacDonald</b>  | 2000 | Science                          |
| <b>MacDonald</b>  | 2003 | Journal of Abnormal Psychology   |
| <b>MacDonald</b>  | 2005 | American Journal of Psychiatry   |
| <b>Macrae</b>     | 2004 | Cerebral Cortex                  |
| <b>Maddock</b>    | 2003 | Human Brain Mapping              |
| <b>Maguire</b>    | 2003 | NeuroImage                       |
| <b>Maguire</b>    | 2004 | NeuroImage                       |
| <b>Maihofner</b>  | 2007 | European Journal of Neuroscience |
| <b>Mainero</b>    | 2004 | NeuroImage                       |
| <b>Malhi</b>      | 2007 | Bipolar Disorders                |
| <b>Malhi</b>      | 2007 | Journal of Affective Disorders   |
| <b>Malisza</b>    | 2005 | Pediatric Research               |
| <b>Mallol</b>     | 2007 | Brain Research                   |
| <b>Maltby</b>     | 2005 | NeuroImage                       |
| <b>Manoach</b>    | 2000 | Biological Psychiatry            |

|                      |      |                                                           |
|----------------------|------|-----------------------------------------------------------|
| <b>Manoach</b>       | 2005 | Schizophrenia Research                                    |
| <b>Maquet</b>        | 1996 | NeuroImage                                                |
| <b>Maril</b>         | 2003 | NeuroImage                                                |
| <b>Markowitsch</b>   | 2003 | Cortex                                                    |
| <b>Marsh</b>         | 2007 | NeuroImage                                                |
| <b>Martin</b>        | 2001 | Journal of Neurophysiology                                |
| <b>Martin</b>        | 2004 | Journal of Neurophysiology                                |
| <b>Martin</b>        | 2007 | Experimental Brain Research                               |
| <b>Martin</b>        | 1995 | Science                                                   |
| <b>Martin</b>        | 1996 | Nature                                                    |
| <b>Martinkauppi</b>  | 2000 | Cerebral Cortex                                           |
| <b>Martin-Soelch</b> | 2001 | European Journal of Neuroscience                          |
| <b>Martin-Soelch</b> | 2003 | European Journal of Neuroscience                          |
| <b>Martin-Solch</b>  | 2001 | Experimental Brain Research                               |
| <b>Mataix-Cols</b>   | 2004 | Archives of General Psychiatry                            |
| <b>Mathiak</b>       | 2006 | Human Brain Mapping                                       |
| <b>Matsumoto</b>     | 2004 | Experimental Brain Research                               |
| <b>Matsuo</b>        | 2003 | Cognitive Brain Research                                  |
| <b>Matsuura</b>      | 2002 | Journal of Urology                                        |
| <b>Mayberg</b>       | 2000 | Biological Psychiatry                                     |
| <b>Mayberg</b>       | 1999 | American Journal of Psychiatry                            |
| <b>Mayer</b>         | 2007 | NeuroImage                                                |
| <b>Mazard</b>        | 2002 | Journal of Cognitive Neuroscience                         |
| <b>McClure</b>       | 2004 | Science                                                   |
| <b>McIntosh</b>      | 1999 | Science                                                   |
| <b>McKay</b>         | 2003 | Journal of Applied Physiology                             |
| <b>McKay</b>         | 2008 | NeuroImage                                                |
| <b>Mechelli</b>      | 2000 | Journal of Cognitive Neuroscience                         |
| <b>Mechelli</b>      | 2006 | NeuroImage                                                |
| <b>Mehnert</b>       | 2008 | NeuroImage                                                |
| <b>Meisenzahl</b>    | 2006 | European Archives of Psychiatry and Clinical Neuroscience |
| <b>Meister</b>       | 2007 | PLoS ONE                                                  |
| <b>Mellet</b>        | 2000 | NeuroImage                                                |
| <b>Mellet</b>        | 2002 | Cerebral Cortex                                           |
| <b>Meltzer</b>       | 2005 | NeuroImage                                                |

|                         |      |                                   |
|-------------------------|------|-----------------------------------|
| <b>Mencl</b>            | 2000 | Microscopy Research and Technique |
| <b>Mendrek</b>          | 2005 | Psychological Medicine            |
| <b>Menon</b>            | 2001 | Human Brain Mapping               |
| <b>Menon</b>            | 2001 | NeuroImage                        |
| <b>Merabet</b>          | 2008 | PLoS ONE                          |
| <b>Meschyan</b>         | 2006 | NeuroImage                        |
| <b>Meyer</b>            | 2002 | Human Brain Mapping               |
| <b>Meyer</b>            | 2005 | Cognitive Brain Research          |
| <b>Meyer-Lindenberg</b> | 2001 | American Journal of Psychiatry    |
| <b>Milea</b>            | 2007 | Neuroreport                       |
| <b>Milham</b>           | 2002 | Brain and Cognition               |
| <b>Milham</b>           | 2003 | Cognitive Brain Research          |
| <b>Milham</b>           | 2003 | NeuroImage                        |
| <b>Milham</b>           | 2005 | Human Brain Mapping               |
| <b>Miller</b>           | 2002 | Journal of Cognitive Neuroscience |
| <b>Milner</b>           | 2007 | NeuroImage                        |
| <b>Mirz</b>             | 1999 | Scandinavian Audiology            |
| <b>Mitchell</b>         | 2004 | British Journal of Psychiatry     |
| <b>Mitchell</b>         | 2006 | European Journal of Neuroscience  |
| <b>Mitchell</b>         | 2003 | Neuropsychologia                  |
| <b>Miura</b>            | 2005 | NeuroImage                        |
| <b>Miyagawa</b>         | 2007 | NeuroImage                        |
| <b>Mo</b>               | 2005 | Human Brain Mapping               |
| <b>Mobbs</b>            | 2007 | Science                           |
| <b>Mochizuki</b>        | 2007 | NeuroImage                        |
| <b>Mochizuki-Kawai</b>  | 2006 | Brain Research                    |
| <b>Mohamed</b>          | 2006 | Radiology                         |
| <b>Monchi</b>           | 2001 | Journal of Neuroscience           |
| <b>Monchi</b>           | 2004 | Journal of Neuroscience           |
| <b>Monks</b>            | 2004 | Bipolar Disorders                 |
| <b>Montaldi</b>         | 2006 | Hippocampus                       |
| <b>Moore</b>            | 1999 | Brain                             |
| <b>Moore</b>            | 1999 | NeuroImage                        |
| <b>Moriguchi</b>        | 2007 | Cerebral Cortex                   |
| <b>Morris</b>           | 1998 | Brain                             |



|                        |      |                                                              |
|------------------------|------|--------------------------------------------------------------|
| <b>Morris</b>          | 1999 | Neuropsychologia                                             |
| <b>Morris</b>          | 2001 | NeuroImage                                                   |
| <b>Mottaghy</b>        | 1999 | Experimental Brain Research                                  |
| <b>Mottaghy</b>        | 2007 | Psychiatry Research                                          |
| <b>Moulier</b>         | 2006 | NeuroImage                                                   |
| <b>Mu</b>              | 2005 | Sleep                                                        |
| <b>Muley</b>           | 2001 | NeuroImage                                                   |
| <b>Muller</b>          | 2002 | Progress In Neuro-Psychopharmacology & Biological Psychiatry |
| <b>Muller</b>          | 2003 | American Journal of Psychiatry                               |
| <b>Muller</b>          | 1997 | Neuroreport                                                  |
| <b>Munzert</b>         | 2008 | Experimental Brain Research                                  |
| <b>Murray</b>          | 2007 | Journal of Neuroscience                                      |
| <b>Murtha</b>          | 1999 | Journal of Cognitive Neuroscience                            |
| <b>Naito</b>           | 1999 | Journal of Neuroscience                                      |
| <b>Naito</b>           | 2000 | Journal of Neurophysiology                                   |
| <b>Najib</b>           | 2004 | American Journal of Psychiatry                               |
| <b>Nakahara</b>        | 2002 | Science                                                      |
| <b>Nakamura</b>        | 2000 | Brain                                                        |
| <b>Nakamura</b>        | 2001 | Neuropsychologia                                             |
| <b>Nakamura</b>        | 2002 | Journal of Cognitive Neuroscience                            |
| <b>Nakamura</b>        | 1998 | Neuroreport                                                  |
| <b>Nakao</b>           | 2005 | Psychiatry Research                                          |
| <b>Nakao</b>           | 2009 | Journal of Psychiatric Research                              |
| <b>Napadow</b>         | 2005 | Human Brain Mapping                                          |
| <b>Nathaniel-James</b> | 2002 | NeuroImage                                                   |
| <b>Neumann</b>         | 2003 | Journal of Fluency Disorders                                 |
| <b>Neuner</b>          | 2007 | Brain Research                                               |
| <b>Ng</b>              | 2001 | Journal of Cognitive Neuroscience                            |
| <b>Nitschke</b>        | 2004 | NeuroImage                                                   |
| <b>Nobre</b>           | 1997 | Brain                                                        |
| <b>Nobre</b>           | 2002 | NeuroImage                                                   |
| <b>Noppeney</b>        | 2002 | NeuroImage                                                   |
| <b>Noppeney</b>        | 2004 | NeuroImage                                                   |
| <b>Noriuchi</b>        | 2008 | Biological Psychiatry                                        |
| <b>Nour</b>            | 2000 | Brain                                                        |

|                  |      |                                                 |
|------------------|------|-------------------------------------------------|
| <b>Nowak</b>     | 2005 | Human Brain Mapping                             |
| <b>Numminen</b>  | 2004 | NeuroImage                                      |
| <b>Nunn</b>      | 2001 | Nature Neuroscience                             |
| <b>Nunneley</b>  | 2002 | Journal of Applied Physiology                   |
| <b>Nyberg</b>    | 1996 | Proceedings of the National Academy of Sciences |
| <b>Nystrom</b>   | 2000 | NeuroImage                                      |
| <b>Ochsner</b>   | 2005 | NeuroImage                                      |
| <b>Ochsner</b>   | 2002 | Journal of Cognitive Neuroscience               |
| <b>Ochsner</b>   | 2004 | Journal of Cognitive Neuroscience               |
| <b>Oda</b>       | 2003 | Biological Psychiatry                           |
| <b>O'Doherty</b> | 2001 | Journal of Neurophysiology                      |
| <b>O'Doherty</b> | 2003 | Neuropsychologia                                |
| <b>Ogawa</b>     | 2005 | Chemical Senses                                 |
| <b>Ogino</b>     | 2007 | Cerebral Cortex                                 |
| <b>Ohnishi</b>   | 2006 | Neuroscience Research                           |
| <b>Okada</b>     | 2003 | Neuropsychobiology                              |
| <b>O'Leary</b>   | 2000 | Neuroreport                                     |
| <b>O'Leary</b>   | 2002 | Neuropsychopharmacology                         |
| <b>Olson</b>     | 2002 | Cognitive Brain Research                        |
| <b>Ongur</b>     | 2005 | Psychiatry Research                             |
| <b>Ongur</b>     | 2006 | Archives of General Psychiatry                  |
| <b>Onozuka</b>   | 2002 | Journal of Dental Research                      |
| <b>Onozuka</b>   | 2003 | Journal of Dental Research                      |
| <b>Ortigue</b>   | 2007 | Journal of Cognitive Neuroscience               |
| <b>Ortigue</b>   | 2007 | NeuroImage                                      |
| <b>Ortuno</b>    | 2002 | NeuroImage                                      |
| <b>Owen</b>      | 1999 | European Journal of Neuroscience                |
| <b>Paine</b>     | 2008 | Dysphagia                                       |
| <b>Paller</b>    | 2003 | Learning & Memory                               |
| <b>Palmer</b>    | 2001 | NeuroImage                                      |
| <b>Paradiso</b>  | 1999 | American Journal of Psychiatry                  |
| <b>Pardo</b>     | 1990 | Proceedings of the National Academy of Sciences |
| <b>Parris</b>    | 2007 | Journal of Cognitive Neuroscience               |
| <b>Paulesu</b>   | 2000 | Nature Neuroscience                             |
| <b>Paulesu</b>   | 1997 | Neuroreport                                     |

|                    |      |                                                 |
|--------------------|------|-------------------------------------------------|
| <b>Paulson</b>     | 1998 | Pain                                            |
| <b>Paus</b>        | 1993 | Journal of Neurophysiology                      |
| <b>Paus</b>        | 1995 | Journal of Neurophysiology                      |
| <b>Pavuluri</b>    | 2007 | Biological Psychiatry                           |
| <b>Payer</b>       | 2008 | Drug and Alcohol Dependence                     |
| <b>Peck</b>        | 2004 | NeuroImage                                      |
| <b>Pelchat</b>     | 2004 | NeuroImage                                      |
| <b>Pelletier</b>   | 2003 | Neuroreport                                     |
| <b>Perani</b>      | 1996 | Neuroreport                                     |
| <b>Perani</b>      | 1998 | Brain                                           |
| <b>Perani</b>      | 2003 | Human Brain Mapping                             |
| <b>Perico</b>      | 2005 | Neuroscience Letters                            |
| <b>Perlstein</b>   | 2001 | American Journal of Psychiatry                  |
| <b>Perlstein</b>   | 2003 | Biological Psychiatry                           |
| <b>Perry</b>       | 1999 | Neuroreport                                     |
| <b>Perry</b>       | 2000 | Brain                                           |
| <b>Pesenti</b>     | 2000 | Journal of Cognitive Neuroscience               |
| <b>Pessoa</b>      | 2002 | Neuron                                          |
| <b>Pessoa</b>      | 2002 | Proceedings of the National Academy of Sciences |
| <b>Petacchi</b>    | 2005 | Human Brain Mapping                             |
| <b>Peters</b>      | 2007 | European Journal of Neuroscience                |
| <b>Petersen</b>    | 1988 | Nature                                          |
| <b>Petersen</b>    | 1989 | Journal of Cognitive Neuroscience               |
| <b>Peterson</b>    | 1999 | Biological Psychiatry                           |
| <b>Peterson</b>    | 2002 | Cognitive Brain Research                        |
| <b>Petit</b>       | 1999 | Human Brain Mapping                             |
| <b>Petrella</b>    | 2006 | Radiology                                       |
| <b>Petrides</b>    | 1993 | Proceedings of the National Academy of Sciences |
| <b>Petrovic</b>    | 2000 | Pain                                            |
| <b>Petrovic</b>    | 2002 | NeuroImage                                      |
| <b>Peyron</b>      | 1999 | Brain                                           |
| <b>Pfefferbaum</b> | 2001 | NeuroImage                                      |
| <b>Phan</b>        | 2005 | Academic Radiology                              |
| <b>Phan</b>        | 2005 | Biological Psychiatry                           |
| <b>Phelps</b>      | 2004 | Neuron                                          |

|                    |      |                                                                           |
|--------------------|------|---------------------------------------------------------------------------|
| <b>Phillips</b>    | 1998 | Psychiatry Research                                                       |
| <b>Phillips</b>    | 1997 | Nature                                                                    |
| <b>Phillips</b>    | 1998 | Proceedings of the Royal Society of London. Series B. Biological Sciences |
| <b>Phillips</b>    | 2004 | NeuroImage                                                                |
| <b>Piefke</b>      | 2005 | Human Brain Mapping                                                       |
| <b>Pierce</b>      | 2004 | Brain                                                                     |
| <b>Pihlajamaki</b> | 2000 | Annals of Neurology                                                       |
| <b>Pihlajamaki</b> | 2003 | Hippocampus                                                               |
| <b>Pinel</b>       | 2001 | NeuroImage                                                                |
| <b>Platek</b>      | 2006 | Human Brain Mapping                                                       |
| <b>Pochon</b>      | 2001 | Cerebral Cortex                                                           |
| <b>Pochon</b>      | 2002 | Proceedings of the National Academy of Sciences                           |
| <b>Podzebenko</b>  | 2002 | NeuroImage                                                                |
| <b>Poellinger</b>  | 2001 | NeuroImage                                                                |
| <b>Poeppel</b>     | 2004 | Neuropsychologia                                                          |
| <b>Poldrack</b>    | 1999 | NeuroImage                                                                |
| <b>Poldrack</b>    | 1999 | Neuropsychology                                                           |
| <b>Poldrack</b>    | 2001 | Brain                                                                     |
| <b>Poldrack</b>    | 2001 | Journal of Cognitive Neuroscience                                         |
| <b>Pollmann</b>    | 2000 | Human Brain Mapping                                                       |
| <b>Porubska</b>    | 2006 | NeuroImage                                                                |
| <b>Postle</b>      | 2007 | Cerebral Cortex                                                           |
| <b>Potenza</b>     | 2003 | American Journal of Psychiatry                                            |
| <b>Pourtois</b>    | 2005 | Cortex                                                                    |
| <b>Preibisch</b>   | 2003 | NeuroImage                                                                |
| <b>Preuschoff</b>  | 2006 | Neuron                                                                    |
| <b>Price</b>       | 1996 | Brain                                                                     |
| <b>Price</b>       | 1996 | NeuroImage                                                                |
| <b>Price</b>       | 1994 | Brain                                                                     |
| <b>Price</b>       | 1996 | Proceedings of the Royal Society of London. Series B. Biological Sciences |
| <b>Price</b>       | 2003 | Brain and Language                                                        |
| <b>Price</b>       | 2005 | Human Brain Mapping                                                       |
| <b>Prince</b>      | 2005 | Journal of Neuroscience                                                   |
| <b>Puttemans</b>   | 2005 | Journal of Neuroscience                                                   |
| <b>Qin</b>         | 2007 | NeuroImage                                                                |

|                  |      |                                                      |
|------------------|------|------------------------------------------------------|
| Quintana         | 2003 | Biological Psychiatry                                |
| Raemaekers       | 2002 | Archives of General Psychiatry                       |
| Ragland          | 2001 | American Journal of Psychiatry                       |
| Ragland          | 2002 | Neuropsychology                                      |
| Ragland          | 2004 | American Journal of Psychiatry                       |
| Ragland          | 2005 | American Journal of Psychiatry                       |
| Ragland          | 2006 | Schizophrenia Research                               |
| Rajah            | 1998 | NeuroImage                                           |
| Rama             | 2001 | NeuroImage                                           |
| Ramnani          | 2003 | Cerebral Cortex                                      |
| Ramnani          | 2000 | Journal of Neurophysiology                           |
| Rand-Giovannetti | 2006 | Neurobiology of Aging                                |
| Ranganath        | 2003 | Neuropsychologia                                     |
| Ranote           | 2004 | Neuroreport                                          |
| Rao              | 1997 | Journal of Neuroscience                              |
| Rao              | 1997 | Neuroreport                                          |
| Rao              | 2001 | Nature Neuroscience                                  |
| Rauch            | 1997 | Human Brain Mapping                                  |
| Rauch            | 2007 | Psychiatry Research                                  |
| Ravnkilde        | 2002 | Journal of Clinical and Experimental Neuropsychology |
| Redcay           | 2008 | Developmental Science                                |
| Reiman           | 1997 | American Journal of Psychiatry                       |
| Reiss            | 2008 | PLoS ONE                                             |
| Rektorova        | 2007 | Movement Disorders                                   |
| Remijnse         | 2006 | Archives of General Psychiatry                       |
| Remy             | 2003 | NeuroImage                                           |
| Reyes            | 2004 | Hearing Research                                     |
| Ricciardi        | 2006 | Neuroscience                                         |
| Riecker          | 2000 | Neuroreport                                          |
| Riecker          | 2002 | NeuroImage                                           |
| Riecker          | 2003 | NeuroImage                                           |
| Riecker          | 2005 | Neurology                                            |
| Riecker          | 2006 | NeuroImage                                           |
| Righi            | 2009 | Journal of Cognitive Neuroscience                    |
| Rilling          | 2004 | Neuroreport                                          |

|                    |      |                                          |
|--------------------|------|------------------------------------------|
| <b>Robinson</b>    | 2009 | Bipolar Disorders                        |
| <b>Rogers</b>      | 2000 | Journal of Cognitive Neuroscience        |
| <b>Rolls</b>       | 2003 | Cerebral Cortex                          |
| <b>Rolls</b>       | 2003 | European Journal of Neuroscience         |
| <b>Rolls</b>       | 2007 | European Journal of Neuroscience         |
| <b>Rosen</b>       | 1999 | Journal of Cognitive Neuroscience        |
| <b>Rosen</b>       | 2000 | Neurology                                |
| <b>Roskies</b>     | 2001 | Journal of Cognitive Neuroscience        |
| <b>Rossell</b>     | 2001 | Neuropsychologia                         |
| <b>Roth</b>        | 2007 | Biological Psychiatry                    |
| <b>Roth</b>        | 2006 | Neuroreport                              |
| <b>Rothemund</b>   | 2007 | NeuroImage                               |
| <b>Rotshtein</b>   | 2007 | Journal of Cognitive Neuroscience        |
| <b>Rotte</b>       | 2002 | Stereotactic and Functional Neurosurgery |
| <b>Rounis</b>      | 2005 | NeuroImage                               |
| <b>Rowan</b>       | 2004 | NeuroImage                               |
| <b>Rowe</b>        | 2000 | Science                                  |
| <b>Royet</b>       | 2000 | Journal of Neuroscience                  |
| <b>Rubia</b>       | 2003 | NeuroImage                               |
| <b>Rubia</b>       | 2006 | Human Brain Mapping                      |
| <b>Rubia</b>       | 2001 | NeuroImage                               |
| <b>Ruby</b>        | 2003 | European Journal of Neuroscience         |
| <b>Rumsey</b>      | 1997 | Brain                                    |
| <b>Rypma</b>       | 1999 | NeuroImage                               |
| <b>Rypma</b>       | 2001 | Psychology and Aging                     |
| <b>Saarela</b>     | 2007 | Cerebral Cortex                          |
| <b>Sabatinelli</b> | 2007 | Journal of Neurophysiology               |
| <b>Sacco</b>       | 2006 | NeuroImage                               |
| <b>Saccuman</b>    | 2006 | NeuroImage                               |
| <b>Sachdev</b>     | 2008 | Neuropsychologia                         |
| <b>Sadato</b>      | 1996 | Journal of Neuroscience                  |
| <b>Sadato</b>      | 1997 | Journal of Neuroscience                  |
| <b>Sadato</b>      | 2005 | Cerebral Cortex                          |
| <b>Sadato</b>      | 1998 | Brain                                    |
| <b>Sadato</b>      | 2002 | NeuroImage                               |

|                        |      |                                           |
|------------------------|------|-------------------------------------------|
| <b>Safron</b>          | 2007 | Behavioral Neuroscience                   |
| <b>Saito</b>           | 2006 | Neuroreport                               |
| <b>Sakurai</b>         | 2000 | Cognitive Brain Research                  |
| <b>Salgado-Pineda</b>  | 2004 | NeuroImage                                |
| <b>Salomons</b>        | 2004 | Journal of Neuroscience                   |
| <b>Samanez-Larkin</b>  | 2007 | Nature Neuroscience                       |
| <b>Samuel</b>          | 1997 | Brain                                     |
| <b>Sanchez-Carrion</b> | 2008 | Journal of Neurotrauma                    |
| <b>Sanjuan</b>         | 2007 | Psychiatry Research                       |
| <b>Savage</b>          | 2001 | Brain                                     |
| <b>Savic</b>           | 2000 | Neuron                                    |
| <b>Savic</b>           | 2001 | Neuron                                    |
| <b>Schaefer</b>        | 2006 | Biological Psychiatry                     |
| <b>Scheres</b>         | 2007 | Biological Psychiatry                     |
| <b>Schienze</b>        | 2005 | International Journal of Psychophysiology |
| <b>Schienze</b>        | 2005 | Neuroscience Letters                      |
| <b>Schiller</b>        | 2008 | Journal of Neuroscience                   |
| <b>Schirmer</b>        | 2004 | NeuroImage                                |
| <b>Schlosser</b>       | 2003 | Neuroreport                               |
| <b>Schmahl</b>         | 2006 | Archives of General Psychiatry            |
| <b>Schmidt</b>         | 2002 | Neuropsychologia                          |
| <b>Schneider</b>       | 2007 | Schizophrenia Research                    |
| <b>Schoenfeld</b>      | 2004 | Neuroscience                              |
| <b>Schoning</b>        | 2007 | Neuropsychologia                          |
| <b>Schreurs</b>        | 1997 | Journal of Neurophysiology                |
| <b>Schulz</b>          | 2005 | Cerebral Cortex                           |
| <b>Schumacher</b>      | 1996 | NeuroImage                                |
| <b>Schwartz</b>        | 2008 | Brain                                     |
| <b>Seghier</b>         | 2008 | Human Brain Mapping                       |
| <b>Seidler</b>         | 2002 | Science                                   |
| <b>Seifert</b>         | 2009 | Journal of Neuroscience                   |
| <b>Seitz</b>           | 2000 | Experimental Brain Research               |
| <b>Seitz</b>           | 1991 | European Journal of Neuroscience          |
| <b>Seitz</b>           | 1992 | Acta Neurologica Scandinavica             |
| <b>Senda</b>           | 1998 | NeuroImage                                |

|                    |      |                                                                    |
|--------------------|------|--------------------------------------------------------------------|
| <b>Sergent</b>     | 1992 | Cerebral Cortex                                                    |
| <b>Sergerie</b>    | 2009 | Schizophrenia Bulletin                                             |
| <b>Seseke</b>      | 2006 | NeuroImage                                                         |
| <b>Seseke</b>      | 2008 | NeuroImage                                                         |
| <b>Seung</b>       | 2005 | Neuroscience Research                                              |
| <b>Seurinck</b>    | 2004 | NeuroImage                                                         |
| <b>Sevostianov</b> | 2002 | Human Brain Mapping                                                |
| <b>Sevostianov</b> | 2002 | International Journal of Neuroscience                              |
| <b>Shamosh</b>     | 2008 | Psychological Science                                              |
| <b>Shapira</b>     | 2003 | Biological Psychiatry                                              |
| <b>Sharot</b>      | 2004 | Nature Neuroscience                                                |
| <b>Shaywitz</b>    | 1995 | Human Brain Mapping                                                |
| <b>Shaywitz</b>    | 2001 | NeuroImage                                                         |
| <b>Shen</b>        | 1999 | Human Brain Mapping                                                |
| <b>Shergill</b>    | 2001 | Psychological Medicine                                             |
| <b>Shergill</b>    | 2002 | Human Brain Mapping                                                |
| <b>Sheridan</b>    | 2007 | Journal of the American Academy of Child and Adolescent Psychiatry |
| <b>Shibata</b>     | 2007 | Brain Research                                                     |
| <b>Shin</b>        | 1999 | American Journal of Psychiatry                                     |
| <b>Shin</b>        | 2000 | Biological Psychiatry                                              |
| <b>Shulman</b>     | 1999 | Journal of Neuroscience                                            |
| <b>Shulman</b>     | 2001 | Proceedings of the National Academy of Sciences                    |
| <b>Siebner</b>     | 1999 | Neuroscience Letters                                               |
| <b>Simmonds</b>    | 2007 | Neuropsychologia                                                   |
| <b>Simmons</b>     | 2005 | Cerebral Cortex                                                    |
| <b>Simon</b>       | 2002 | Neuron                                                             |
| <b>Simon</b>       | 2004 | NeuroImage                                                         |
| <b>Simpson</b>     | 2000 | Journal of Cognitive Neuroscience                                  |
| <b>Singer</b>      | 2004 | Science                                                            |
| <b>Siok</b>        | 2004 | Nature                                                             |
| <b>Small</b>       | 2001 | Brain                                                              |
| <b>Small</b>       | 2003 | Neuron                                                             |
| <b>Smeets</b>      | 2006 | American Journal of Clinical Nutrition                             |
| <b>Smith</b>       | 1996 | Cerebral Cortex                                                    |
| <b>Smith</b>       | 2001 | Journal of Neuroimaging                                            |



|                        |      |                                                                           |
|------------------------|------|---------------------------------------------------------------------------|
| <b>Smith</b>           | 2004 | Human Brain Mapping                                                       |
| <b>Smith</b>           | 2002 | British Journal of Psychiatry                                             |
| <b>Smits</b>           | 2007 | Neuroradiology                                                            |
| <b>Sobel</b>           | 2000 | Journal of Neurophysiology                                                |
| <b>Soderlund</b>       | 2007 | NeuroImage                                                                |
| <b>Sommer</b>          | 2007 | NeuroImage                                                                |
| <b>Sommer</b>          | 2008 | Acta Neurobiologiae Experimentalis                                        |
| <b>Sonty</b>           | 2003 | Annals of Neurology                                                       |
| <b>Soros</b>           | 2006 | NeuroImage                                                                |
| <b>Sowell</b>          | 2007 | Neuroreport                                                               |
| <b>Speer</b>           | 2003 | Biological Psychiatry                                                     |
| <b>Spence</b>          | 2001 | Neuroreport                                                               |
| <b>Spence</b>          | 2008 | NeuroImage                                                                |
| <b>Sperling</b>        | 2001 | Human Brain Mapping                                                       |
| <b>Sperling</b>        | 2003 | Journal of Neurology, Neurosurgery, and Psychiatry                        |
| <b>Sperling</b>        | 2003 | NeuroImage                                                                |
| <b>Spreckelmeyer</b>   | 2009 | Social Cognitive and Affective Neuroscience                               |
| <b>Sprengelmeyer</b>   | 1998 | Proceedings of the Royal Society of London. Series B. Biological Sciences |
| <b>Stanescu-Cosson</b> | 2000 | Brain                                                                     |
| <b>Staresina</b>       | 2006 | Journal of Neuroscience                                                   |
| <b>Stark</b>           | 2005 | Biological Psychology                                                     |
| <b>Stark</b>           | 2007 | NeuroImage                                                                |
| <b>Staudt</b>          | 2002 | NeuroImage                                                                |
| <b>Steel</b>           | 2001 | Neuroreport                                                               |
| <b>Stephan</b>         | 1995 | Journal of Neurophysiology                                                |
| <b>Stephan</b>         | 2002 | NeuroImage                                                                |
| <b>Stern</b>           | 2000 | NeuroImage                                                                |
| <b>Stevens</b>         | 2000 | Magnetic Resonance Imaging                                                |
| <b>Stevens</b>         | 1998 | Archives of General Psychiatry                                            |
| <b>Stippich</b>        | 2003 | Neuroscience Letters                                                      |
| <b>Stoesz</b>          | 2003 | International Journal of Psychophysiology                                 |
| <b>Stoeter</b>         | 2007 | NeuroImage                                                                |
| <b>Stoleru</b>         | 1999 | Archives of Sexual Behavior                                               |
| <b>Strakowski</b>      | 2004 | Neuropsychopharmacology                                                   |
| <b>Strangman</b>       | 2005 | Neurorehabilitation and Neural Repair                                     |

|                   |      |                                                                    |
|-------------------|------|--------------------------------------------------------------------|
| <b>Strathearn</b> | 2008 | Pediatrics                                                         |
| <b>Straube</b>    | 2007 | NeuroImage                                                         |
| <b>Strigo</b>     | 2003 | Journal of Neurophysiology                                         |
| <b>Sturm</b>      | 1999 | Neuropsychologia                                                   |
| <b>Suchan</b>     | 2008 | Hippocampus                                                        |
| <b>Sugiura</b>    | 2000 | NeuroImage                                                         |
| <b>Sugiura</b>    | 2001 | NeuroImage                                                         |
| <b>Suh</b>        | 2007 | Brain Research                                                     |
| <b>Suzuki</b>     | 2002 | NeuroImage                                                         |
| <b>Suzuki</b>     | 2001 | Journal of Gerontology                                             |
| <b>Suzuki</b>     | 2002 | Neuroscience Research Communications                               |
| <b>Svensson</b>   | 1997 | Journal of Neurophysiology                                         |
| <b>Svensson</b>   | 1998 | European Journal of Pain                                           |
| <b>Swainson</b>   | 2003 | Journal of Cognitive Neuroscience                                  |
| <b>Sylvester</b>  | 2003 | Neuropsychologia                                                   |
| <b>Szameitat</b>  | 2007 | European Journal of Neuroscience                                   |
| <b>Szameitat</b>  | 2007 | NeuroImage                                                         |
| <b>Szameitat</b>  | 2002 | Journal of Cognitive Neuroscience                                  |
| <b>Takahashi</b>  | 2006 | NeuroImage                                                         |
| <b>Takano</b>     | 2004 | NeuroImage                                                         |
| <b>Tamm</b>       | 2002 | Journal of the American Academy of Child and Adolescent Psychiatry |
| <b>Tan</b>        | 2000 | Human Brain Mapping                                                |
| <b>Tan</b>        | 2001 | NeuroImage                                                         |
| <b>Tan</b>        | 2001 | Neuroreport                                                        |
| <b>Tan</b>        | 2003 | Human Brain Mapping                                                |
| <b>Tan</b>        | 2005 | American Journal of Psychiatry                                     |
| <b>Tan</b>        | 2005 | Human Brain Mapping                                                |
| <b>Tan</b>        | 2006 | American Journal of Psychiatry                                     |
| <b>Tanaka</b>     | 2006 | BMC Neurology                                                      |
| <b>Tang</b>       | 2006 | Journal of Cognitive Neuroscience                                  |
| <b>Tapert</b>     | 2003 | Archives of General Psychiatry                                     |
| <b>Tataranni</b>  | 1999 | Proceedings of the National Academy of Sciences                    |
| <b>Tatsumi</b>    | 1999 | NeuroImage                                                         |
| <b>Taylor</b>     | 1997 | NeuroImage                                                         |
| <b>Taylor</b>     | 2000 | Neuropsychologia                                                   |

|                        |      |                                   |
|------------------------|------|-----------------------------------|
| <b>Taylor</b>          | 2003 | NeuroImage                        |
| <b>Teasdale</b>        | 1999 | American Journal of Psychiatry    |
| <b>Temple</b>          | 2001 | Neuroreport                       |
| <b>Thaut</b>           | 2008 | PLoS ONE                          |
| <b>Thierry</b>         | 2003 | Human Brain Mapping               |
| <b>Thivard</b>         | 2000 | Neuroreport                       |
| <b>Thompson</b>        | 2007 | Journal of Cognitive Neuroscience |
| <b>Thompson-Schill</b> | 1999 | Neuropsychologia                  |
| <b>Thut</b>            | 1997 | Neuroreport                       |
| <b>Tieleman</b>        | 2005 | NeuroImage                        |
| <b>Tobler</b>          | 2007 | Journal of Neurophysiology        |
| <b>Tourville</b>       | 2008 | NeuroImage                        |
| <b>Toyomura</b>        | 2007 | Neuroscience                      |
| <b>Tracey</b>          | 2000 | Neuroscience Letters              |
| <b>Tranel</b>          | 2005 | Brain and Language                |
| <b>Tremblay</b>        | 2005 | Archives of General Psychiatry    |
| <b>Tsujimura</b>       | 2006 | Journal of Urology                |
| <b>Tsukiura</b>        | 2002 | Human Brain Mapping               |
| <b>Tunik</b>           | 2007 | Journal of Neurophysiology        |
| <b>Turkeltaub</b>      | 2002 | NeuroImage                        |
| <b>Turner</b>          | 1998 | Journal of Neurophysiology        |
| <b>Ueda</b>            | 2003 | Neuroreport                       |
| <b>Uher</b>            | 2006 | Behavioural Brain Research        |
| <b>Ullsperger</b>      | 2001 | NeuroImage                        |
| <b>Ullsperger</b>      | 2003 | Journal of Neuroscience           |
| <b>Uncapher</b>        | 2005 | Journal of Neuroscience           |
| <b>Uncapher</b>        | 2006 | Neuron                            |
| <b>Valet</b>           | 2004 | Pain                              |
| <b>van</b>             | 1998 | Journal of Neurophysiology        |
| <b>van</b>             | 2004 | Cognitive Brain Research          |
| <b>van</b>             | 2000 | Nature Neuroscience               |
| <b>van</b>             | 2001 | NeuroImage                        |
| <b>van</b>             | 2003 | Cerebral Cortex                   |
| <b>van</b>             | 2005 | Archives of General Psychiatry    |
| <b>van</b>             | 2003 | Hearing Research                  |

|                          |      |                                                                    |
|--------------------------|------|--------------------------------------------------------------------|
| <b>Vandekerckhove</b>    | 2005 | Behavioural Neurology                                              |
| <b>Vandenberghe</b>      | 2001 | NeuroImage                                                         |
| <b>Vandenberghe</b>      | 2002 | Journal of Cognitive Neuroscience                                  |
| <b>Vandenberghe</b>      | 1997 | Journal of Neuroscience                                            |
| <b>Vanderwal</b>         | 2008 | NeuroImage                                                         |
| <b>Vanlancker-Sidtis</b> | 2003 | Brain and Language                                                 |
| <b>Vanrie</b>            | 2002 | Neuropsychologia                                                   |
| <b>Veit</b>              | 2002 | Neuroscience Letters                                               |
| <b>Veltman</b>           | 2003 | NeuroImage                                                         |
| <b>Videbech</b>          | 2001 | Psychological Medicine                                             |
| <b>Vingerhoets</b>       | 2003 | NeuroImage                                                         |
| <b>Vingerhoets</b>       | 2001 | NeuroImage                                                         |
| <b>Vingerhoets</b>       | 2002 | NeuroImage                                                         |
| <b>Vink</b>              | 2005 | Human Brain Mapping                                                |
| <b>Vinogradov</b>        | 2008 | Cerebral Cortex                                                    |
| <b>Vitali</b>            | 2005 | Brain and Language                                                 |
| <b>Voets</b>             | 2006 | Brain                                                              |
| <b>Volle</b>             | 2005 | Cerebral Cortex                                                    |
| <b>Vollm</b>             | 2006 | NeuroImage                                                         |
| <b>Volz</b>              | 2003 | NeuroImage                                                         |
| <b>Volz</b>              | 2004 | NeuroImage                                                         |
| <b>Votaw</b>             | 1999 | NeuroImage                                                         |
| <b>Vouloumanos</b>       | 2001 | Journal of Cognitive Neuroscience                                  |
| <b>Vuilleumier</b>       | 2001 | Neuron                                                             |
| <b>Wagner</b>            | 2006 | Biological Psychiatry                                              |
| <b>Walter</b>            | 2007 | Journal of Affective Disorders                                     |
| <b>Wang</b>              | 2007 | Archives of General Psychiatry                                     |
| <b>Wang</b>              | 2007 | NeuroImage                                                         |
| <b>Wang</b>              | 2004 | Journal of the American Academy of Child and Adolescent Psychiatry |
| <b>Warburton</b>         | 1996 | Brain                                                              |
| <b>Wartenburger</b>      | 2003 | Neuron                                                             |
| <b>Watanabe</b>          | 2004 | NeuroImage                                                         |
| <b>Watanabe</b>          | 2008 | NeuroImage                                                         |
| <b>Weis</b>              | 2004 | Neuroreport                                                        |
| <b>Weiss</b>             | 2003 | Psychiatry Research                                                |

|                   |      |                                                   |
|-------------------|------|---------------------------------------------------|
| <b>Weiss</b>      | 2004 | Schizophrenia Research                            |
| <b>Weiss</b>      | 2006 | Biological Psychiatry                             |
| <b>Wheeler</b>    | 2000 | Proceedings of the National Academy of Sciences   |
| <b>Wicker</b>     | 2003 | Neuron                                            |
| <b>Wild</b>       | 2003 | Psychiatry Research                               |
| <b>Wildgruber</b> | 2005 | NeuroImage                                        |
| <b>Wildgruber</b> | 2002 | NeuroImage                                        |
| <b>Williams</b>   | 2001 | NeuroImage                                        |
| <b>Williams</b>   | 2005 | NeuroImage                                        |
| <b>Wilson</b>     | 2009 | Brain                                             |
| <b>Wilson</b>     | 2004 | Nature Neuroscience                               |
| <b>Winstein</b>   | 1997 | Journal of Neurophysiology                        |
| <b>Winston</b>    | 2003 | NeuroImage                                        |
| <b>Winston</b>    | 2007 | Neuropsychologia                                  |
| <b>Winterer</b>   | 2002 | NeuroImage                                        |
| <b>Wise</b>       | 1991 | Brain                                             |
| <b>Wise</b>       | 2001 | Brain                                             |
| <b>Wittfoth</b>   | 2008 | Brain Research                                    |
| <b>Wittmann</b>   | 2007 | Experimental Brain Research                       |
| <b>Wong</b>       | 2007 | NeuroImage                                        |
| <b>Wong</b>       | 2008 | Journal of Speech, Language, and Hearing Research |
| <b>Wood</b>       | 2003 | Journal of Cognitive Neuroscience                 |
| <b>Woodard</b>    | 2007 | Journal of Cognitive Neuroscience                 |
| <b>Woodruff</b>   | 2005 | Neuropsychologia                                  |
| <b>Wraga</b>      | 2005 | Neuropsychologia                                  |
| <b>Wrase</b>      | 2003 | Neuroscience Letters                              |
| <b>Wrase</b>      | 2007 | NeuroImage                                        |
| <b>Wright</b>     | 2002 | Neuroreport                                       |
| <b>Wu</b>         | 1999 | American Journal of Psychiatry                    |
| <b>Wu</b>         | 2008 | Journal of Child Neurology                        |
| <b>Wykes</b>      | 2002 | British Journal of Psychiatry                     |
| <b>Xiang</b>      | 2003 | Human Brain Mapping                               |
| <b>Xiong</b>      | 2000 | NeuroImage                                        |
| <b>Xu</b>         | 2002 | NeuroImage                                        |
| <b>Xu</b>         | 2009 | Brain Research                                    |

|           |      |                                                                    |
|-----------|------|--------------------------------------------------------------------|
| Xu        | 1997 | Neuroreport                                                        |
| Xue       | 2004 | Neuroreport                                                        |
| Yacubian  | 2006 | Journal of Neuroscience                                            |
| Yang      | 2003 | Journal of the American Academy of Child and Adolescent Psychiatry |
| Yassa     | 2008 | Neurology                                                          |
| Yatham    | 2000 | Archives of General Psychiatry                                     |
| Yin       | 2006 | Journal of Nuclear Medicine                                        |
| Yokoyama  | 2006 | NeuroImage                                                         |
| Yonelinas | 2005 | Journal of Neuroscience                                            |
| Yoo       | 2005 | International Journal of Neuroscience                              |
| Yoo       | 2003 | Neuroreport                                                        |
| Yoo       | 2004 | NeuroImage                                                         |
| Yoo       | 2007 | Nature Neuroscience                                                |
| Yoon      | 2006 | Neuroscience Letters                                               |
| Yoon      | 2009 | Neuroscience Letters                                               |
| Yucel     | 2007 | Archives of General Psychiatry                                     |
| Zago      | 2001 | NeuroImage                                                         |
| Zald      | 1999 | Annals of Neurology                                                |
| Zald      | 2002 | Proceedings of the National Academy of Sciences                    |
| Zald      | 1998 | Brain                                                              |
| Zatorre   | 1992 | Nature                                                             |
| Zatorre   | 1998 | Proceedings of the National Academy of Sciences                    |
| Zelkowitz | 1998 | Journal of the International Neuropsychological Society            |
| Zhang     | 2005 | NeuroImage                                                         |
| Zhang     | 2005 | Human Brain Mapping                                                |
| Zink      | 2004 | Neuron                                                             |
| Zysset    | 2001 | Neuroscience Letters                                               |
| Zysset    | 2002 | NeuroImage                                                         |

TAB S2 ALE CLUSTERS RELATIVE TO THE CLUSTER 1 RIGHT

| Cluster # | Volume (m | Weighted Center (x,y,z)                                                          | x      | y      | z   | Label |                                                                                    |        |       |     |     |                                                                                       |
|-----------|-----------|----------------------------------------------------------------------------------|--------|--------|-----|-------|------------------------------------------------------------------------------------|--------|-------|-----|-----|---------------------------------------------------------------------------------------|
| 1         | 69280     | 4.08                                                                             | 6.85   | 7.03   | 36  | 14    | 2 Right Cerebrum.Sub-lobar.Insula.Gray Matter.*                                    |        |       |     |     |                                                                                       |
|           |           |                                                                                  |        |        | -34 | 14    | 4 Left Cerebrum.Sub-lobar.Clastrum.Gray Matter.*                                   |        |       |     |     |                                                                                       |
|           |           |                                                                                  |        |        | 12  | 8     | 2 Right Cerebrum.Sub-lobar.Caudate.Gray Matter.Caudate Head                        |        |       |     |     |                                                                                       |
|           |           |                                                                                  |        |        | -10 | -18   | 6 Left Cerebrum.Sub-lobar.Thalamus.Gray Matter.Medial Dorsal Nucleus               |        |       |     |     |                                                                                       |
|           |           |                                                                                  |        |        | 8   | -26   | -2 Right Cerebrum.Sub-lobar.Thalamus.Gray Matter.*                                 |        |       |     |     |                                                                                       |
|           |           |                                                                                  |        |        | -10 | 2     | 8 Left Cerebrum.Sub-lobar.Caudate.Gray Matter.Caudate Body                         |        |       |     |     |                                                                                       |
|           |           |                                                                                  |        |        | 10  | -6    | 10 Right Cerebrum.Sub-lobar.Thalamus.Gray Matter.Anterior Nucleus                  |        |       |     |     |                                                                                       |
|           |           |                                                                                  |        |        | 4   | -16   | 2 Right Cerebrum.Sub-lobar.Thalamus.Gray Matter.*                                  |        |       |     |     |                                                                                       |
|           |           |                                                                                  |        |        | -46 | 4     | 24 Left Cerebrum.Frontal Lobe.Inferior Frontal Gyrus.Gray Matter.Brodman area 9    |        |       |     |     |                                                                                       |
|           |           |                                                                                  |        |        | -42 | 20    | 24 Left Cerebrum.Frontal Lobe.Middle Frontal Gyrus.Gray Matter.Brodman area 46     |        |       |     |     |                                                                                       |
|           |           |                                                                                  |        |        | -20 | 2     | 4 Left Cerebrum.Sub-lobar.Lentiform Nucleus.Gray Matter.Putamen                    |        |       |     |     |                                                                                       |
|           |           |                                                                                  |        |        | 32  | 32    | 26 Right Cerebrum.Frontal Lobe.Middle Frontal Gyrus.Gray Matter.Brodman area 9     |        |       |     |     |                                                                                       |
|           |           |                                                                                  |        |        | -42 | -8    | 42 Left Cerebrum.Frontal Lobe.Precentral Gyrus.Gray Matter.Brodman area 6          |        |       |     |     |                                                                                       |
|           |           |                                                                                  |        |        | 34  | 42    | 20 Right Cerebrum.Frontal Lobe.Middle Frontal Gyrus.Gray Matter.Brodman area 10    |        |       |     |     |                                                                                       |
|           |           |                                                                                  |        |        | 44  | 8     | 34 Right Cerebrum.Frontal Lobe.Middle Frontal Gyrus.Gray Matter.Brodman area 9     |        |       |     |     |                                                                                       |
|           |           |                                                                                  |        |        | 38  | 28    | 20 Right Cerebrum.Frontal Lobe.Middle Frontal Gyrus.Gray Matter.Brodman area 46    |        |       |     |     |                                                                                       |
|           |           |                                                                                  |        |        | 38  | 24    | 30 Right Cerebrum.Frontal Lobe.Middle Frontal Gyrus.Gray Matter.Brodman area 9     |        |       |     |     |                                                                                       |
|           |           |                                                                                  |        |        | 0   | -34   | -16 Left Cerebellum.Anterior Lobe.Culmen.Gray Matter.*                             |        |       |     |     |                                                                                       |
|           |           |                                                                                  |        |        | 2   | 17296 | -1.07                                                                              | 8.31   | 44.44 | 36  | -2  | 52 Right Cerebrum.Frontal Lobe.Middle Frontal Gyrus.Gray Matter.Brodman area 6        |
| 44        | -2        | 48 Right Cerebrum.Frontal Lobe.Precentral Gyrus.Gray Matter.Brodman area 6       |        |        |     |       |                                                                                    |        |       |     |     |                                                                                       |
| 18        | -8        | -8 Right Cerebrum.Sub-lobar.Lentiform Nucleus.Gray Matter.Medial Globus Pallidus |        |        |     |       |                                                                                    |        |       |     |     |                                                                                       |
| -2        | 10        | 44 Left Cerebrum.Frontal Lobe.Medial Frontal Gyrus.Gray Matter.Brodman area 32   |        |        |     |       |                                                                                    |        |       |     |     |                                                                                       |
| 2         | 30        | 24 Right Cerebrum.Limbic Lobe.Cingulate Gyrus.Gray Matter.Brodman area 32        |        |        |     |       |                                                                                    |        |       |     |     |                                                                                       |
| 3         | 6584      | 42.61                                                                            | -48.11 | 34.41  |     |       |                                                                                    |        |       | 32  | -60 | 40 Right Cerebrum.Parietal Lobe.Sub-Gyral.Gray Matter.Brodman area 39                 |
|           |           |                                                                                  |        |        |     |       |                                                                                    |        |       | 48  | -48 | 40 Right Cerebrum.Parietal Lobe.Inferior Parietal Lobule.Gray Matter.Brodman area 40  |
|           |           |                                                                                  |        |        |     |       |                                                                                    |        |       | 50  | -32 | 26 Right Cerebrum.Parietal Lobe.Inferior Parietal Lobule.Gray Matter.Brodman area 40  |
|           |           |                                                                                  |        |        |     |       |                                                                                    |        |       | 54  | -40 | 18 Right Cerebrum.Temporal Lobe.Superior Temporal Gyrus.Gray Matter.Brodman area 13   |
|           |           |                                                                                  |        |        |     |       |                                                                                    |        |       | 38  | -44 | 42 Right Cerebrum.Parietal Lobe.Inferior Parietal Lobule.Gray Matter.Brodman area 40  |
|           |           |                                                                                  |        |        | 54  | -44   | 32 Right Cerebrum.Parietal Lobe.Supramarginal Gyrus.Gray Matter.Brodman area 40    |        |       |     |     |                                                                                       |
|           |           |                                                                                  |        |        | 52  | -40   | 6 Right Cerebrum.Temporal Lobe.Superior Temporal Gyrus.Gray Matter.Brodman area 22 |        |       |     |     |                                                                                       |
|           |           |                                                                                  |        |        | -30 | -54   | 36 Left Cerebrum.Parietal Lobe.Angular Gyrus.Gray Matter.Brodman area 39           |        |       |     |     |                                                                                       |
| 4         | 5024      | -33.82                                                                           | -52.81 | 40.52  | -32 | -56   | 46 Left Cerebrum.Parietal Lobe.Inferior Parietal Lobule.Gray Matter.Brodman area 7 |        |       |     |     |                                                                                       |
|           |           |                                                                                  |        |        | -46 | -38   | 34 Left Cerebrum.Parietal Lobe.Supramarginal Gyrus.Gray Matter.Brodman area 40     |        |       |     |     |                                                                                       |
|           |           |                                                                                  |        |        | 5   | 3040  | -35.97                                                                             | -60.1  | -17.4 | -36 | -58 | -20 Left Cerebellum.Posterior Lobe.Declive.Gray Matter.*                              |
|           |           |                                                                                  |        |        |     |       |                                                                                    |        |       | -36 | -76 | -16 Left Cerebellum.Posterior Lobe.Declive.Gray Matter.*                              |
| 6         | 2504      | -53.3                                                                            | -31.01 | 18.27  | -54 | -24   | 18 Left Cerebrum.Parietal Lobe.Postcentral Gyrus.Gray Matter.Brodman area 40       |        |       |     |     |                                                                                       |
|           |           |                                                                                  |        |        | -56 | -38   | 20 Left Cerebrum.Temporal Lobe.Superior Temporal Gyrus.Gray Matter.Brodman area 13 |        |       |     |     |                                                                                       |
| 7         | 1208      | 32.03                                                                            | -58.82 | -22.35 | 30  | -58   | -26 Right Cerebellum.Anterior Lobe.Culmen.Gray Matter.*                            |        |       |     |     |                                                                                       |
|           |           |                                                                                  |        |        | 32  | -54   | -18 Right Cerebellum.Posterior Lobe.Declive.Gray Matter.*                          |        |       |     |     |                                                                                       |
|           |           |                                                                                  |        |        | 38  | -70   | -12 Right Cerebrum.Occipital Lobe.Fusiform Gyrus.Gray Matter.Brodman area 19       |        |       |     |     |                                                                                       |
| 8         | 488       | -30.34                                                                           | -11.87 | 56.93  | -32 | -14   | 58 Left Cerebrum.Frontal Lobe.Precentral Gyrus.Gray Matter.Brodman area 6          |        |       |     |     |                                                                                       |
|           |           |                                                                                  |        |        | 9   | 312   | 23.08                                                                              | -87.55 | -6.58 | 24  | -88 | -6 Right Cerebrum.Occipital Lobe.Inferior Occipital Gyrus.Gray Matter.Brodman area 18 |

ALE MAPS WERE COMPUTED AT AN FDR-CORRECTED THRESHOLD OF  $P < 0.05$ ; MINIMUM CLUSTER DIMENSION  $K > 100MM^3$

TAB S3 ALE CLUSTERS RELATIVE TO THE CLUSTER 2 RIGHT

| Cluster # | Volume (mm <sup>3</sup> ) | Weighted Center (x,y,z) |        |        | x   | y   | z                                                                                     | Label |
|-----------|---------------------------|-------------------------|--------|--------|-----|-----|---------------------------------------------------------------------------------------|-------|
| 1         | 12400                     | 38.26                   | -12.99 | 9.21   | 38  | -12 | 6 Right Cerebrum.Sub-lobar.Clastrum.Gray Matter.*                                     |       |
|           |                           |                         |        |        | 56  | -26 | 26 Right Cerebrum.Parietal Lobe.Inferior Parietal Lobule.Gray Matter.Brodman area 40  |       |
|           |                           |                         |        |        | 50  | -24 | 22 Right Cerebrum.Sub-lobar.Insula.Gray Matter.Brodman area 13                        |       |
|           |                           |                         |        |        | 56  | -16 | 14 Right Cerebrum.Temporal Lobe.Transverse Temporal Gyrus.Gray Matter.Brodman area 41 |       |
|           |                           |                         |        |        | 36  | 6   | 6 Right Cerebrum.Sub-lobar.Insula.Gray Matter.Brodman area 13                         |       |
| 2         | 7376                      | -42.73                  | -14.37 | 8.33   | -42 | -12 | 6 Left Cerebrum.Sub-lobar.Insula.Gray Matter.Brodman area 13                          |       |
|           |                           |                         |        |        | -44 | -26 | 16 Left Cerebrum.Sub-lobar.Insula.Gray Matter.Brodman area 41                         |       |
|           |                           |                         |        |        | -56 | -16 | 14 Left Cerebrum.Temporal Lobe.Transverse Temporal Gyrus.Gray Matter.Brodman area 42  |       |
|           |                           |                         |        |        | -60 | -8  | 16 Left Cerebrum.Parietal Lobe.Postcentral Gyrus.Gray Matter.Brodman area 43          |       |
|           |                           |                         |        |        | 0   | -10 | 44 Left Cerebrum.Frontal Lobe.Paracentral Lobule.Gray Matter.Brodman area 31          |       |
| 3         | 2712                      | -2.47                   | -10.57 | 43.6   | -6  | -6  | 34 Left Cerebrum.Limbic Lobe.Cingulate Gyrus.Gray Matter.Brodman area 24              |       |
|           |                           |                         |        |        | 14  | -16 | 2 Right Cerebrum.Sub-lobar.Thalamus.Gray Matter.*                                     |       |
| 4         | 1224                      | 8.45                    | -16.78 | 5.82   | -2  | -20 | 10 Left Cerebrum.Sub-lobar.Thalamus.Gray Matter.*                                     |       |
|           |                           |                         |        |        | 6   | 40  | 0 Right Cerebrum.Limbic Lobe.Anterior Cingulate.Gray Matter.Brodman area 32           |       |
| 5         | 1072                      | 3.52                    | 39.56  | -0.04  | -6  | 34  | -2 Left Cerebrum.Limbic Lobe.Anterior Cingulate.Gray Matter.Brodman area 32           |       |
|           |                           |                         |        |        | 0   | -50 | 34 Left Cerebrum.Parietal Lobe.Precuneus.Gray Matter.Brodman area 31                  |       |
| 6         | 864                       | -0.16                   | -51.21 | 33.17  | -4  | -54 | 36 Left Cerebrum.Parietal Lobe.Precuneus.Gray Matter.Brodman area 7                   |       |
|           |                           |                         |        |        | 6   | -50 | 30 Right Cerebrum.Parietal Lobe.Precuneus.Gray Matter.Brodman area 31                 |       |
|           |                           |                         |        |        | -12 | -12 | 4 Left Cerebrum.Sub-lobar.Thalamus.Gray Matter.Ventral Lateral Nucleus                |       |
| 7         | 584                       | -11.2                   | -11.33 | 3.92   | -12 | -12 | -18 Right Cerebellum.Anterior Lobe.Culmen.Gray Matter.*                               |       |
| 8         | 576                       | 3.34                    | -56.56 | -18.12 | 4   | -56 | 16 Right Cerebrum.Limbic Lobe.Anterior Cingulate.Gray Matter.Brodman area 24          |       |
| 9         | 488                       | 3.07                    | 32.39  | 17.1   | 4   | 32  | 12 Left Cerebrum.Sub-lobar.Thalamus.Gray Matter.Pulvinar                              |       |
| 10        | 376                       | -13.85                  | -25.7  | 10.19  | -14 | -28 | 6 Left Cerebrum.Limbic Lobe.Anterior Cingulate.Gray Matter.Brodman area 32            |       |
| 11        | 224                       | -5.79                   | 46.24  | 5.08   | -6  | 46  |                                                                                       |       |

ALE MAPS WERE COMPUTED AT AN FDR-CORRECTED THRESHOLD OF  $P < 0.05$ ; MINIMUM CLUSTER DIMENSION  $K > 100\text{MM}^3$



TAB S4 ALE CLUSTERS RELATIVE TO THE CLUSTER 1 LEFT

| Cluster # | Volume | m Weighted Center (x,y,z) | x      | y      | z   | Label |                                                                                       |
|-----------|--------|---------------------------|--------|--------|-----|-------|---------------------------------------------------------------------------------------|
| 1         | 100560 | -6.01                     | 9.78   | 10.92  | -34 | 16    | 2 Left Cerebrum.Sub-lobar.Insula.Gray Matter.*                                        |
|           |        |                           |        |        | 32  | 18    | 2 Right Cerebrum.Sub-lobar.Insula.Gray Matter.*                                       |
|           |        |                           |        |        | -42 | 2     | 30 Left Cerebrum.Frontal Lobe.Inferior Frontal Gyrus.Gray Matter.Brodmann area 9      |
|           |        |                           |        |        | 10  | 4     | 4 Right Cerebrum.Sub-lobar.Caudate.Gray Matter.Caudate Head                           |
|           |        |                           |        |        | -8  | -22   | 6 Left Cerebrum.Sub-lobar.Thalamus.Gray Matter.Pulvinar                               |
|           |        |                           |        |        | -12 | 2     | 6 Left Cerebrum.Sub-lobar.Lentiform Nucleus.Gray Matter.Lateral Globus Pallidus       |
|           |        |                           |        |        | 4   | -20   | 2 Right Cerebrum.Sub-lobar.Thalamus.Gray Matter.*                                     |
|           |        |                           |        |        | -44 | 18    | 24 Left Cerebrum.Frontal Lobe.Middle Frontal Gyrus.Gray Matter.Brodmann area 46       |
|           |        |                           |        |        | 44  | 6     | 32 Right Cerebrum.Frontal Lobe.Inferior Frontal Gyrus.Gray Matter.Brodmann area 9     |
|           |        |                           |        |        | 36  | 26    | 32 Right Cerebrum.Frontal Lobe.Middle Frontal Gyrus.Gray Matter.Brodmann area 9       |
|           |        |                           |        |        | 42  | 24    | 30 Right Cerebrum.Frontal Lobe.Middle Frontal Gyrus.Gray Matter.Brodmann area 9       |
|           |        |                           |        |        | -34 | 42    | 16 Left Cerebrum.Frontal Lobe.Middle Frontal Gyrus.Gray Matter.Brodmann area 10       |
|           |        |                           |        |        | -30 | -6    | 50 Left Cerebrum.Frontal Lobe.Precentral Gyrus.Gray Matter.Brodmann area 6            |
|           |        |                           |        |        | -48 | -4    | 6 Left Cerebrum.Frontal Lobe.Precentral Gyrus.Gray Matter.Brodmann area 6             |
|           |        |                           |        |        | -40 | 32    | 12 Left Cerebrum.Frontal Lobe.Middle Frontal Gyrus.Gray Matter.Brodmann area 46       |
|           |        |                           |        |        | 32  | 52    | 8 Right Cerebrum.Frontal Lobe.Middle Frontal Gyrus.Gray Matter.Brodmann area 10       |
|           |        |                           |        |        | 22  | 0     | 52 Right Cerebrum.Frontal Lobe.Sub-Gyral.Gray Matter.Brodmann area 6                  |
|           |        |                           |        |        | 34  | 48    | 8 Right Cerebrum.Frontal Lobe.Middle Frontal Gyrus.Gray Matter.Brodmann area 10       |
|           |        |                           |        |        | -30 | 32    | 30 Left Cerebrum.Frontal Lobe.Middle Frontal Gyrus.Gray Matter.Brodmann area 9        |
|           |        |                           |        |        | 34  | -8    | 54 Right Cerebrum.Frontal Lobe.Precentral Gyrus.Gray Matter.Brodmann area 6           |
| 2         | 22384  | -0.85                     | 11.83  | 43.71  | -2  | 10    | 46 Left Cerebrum.Frontal Lobe.Medial Frontal Gyrus.Gray Matter.Brodmann area 32       |
| 3         | 10344  | -34.51                    | -53.15 | 40.45  | -34 | -52   | 40 Left Cerebrum.Parietal Lobe.Inferior Parietal Lobule.Gray Matter.Brodmann area 40  |
| 4         | 5496   | 33.5                      | -51.93 | 40.73  | 34  | -48   | 40 Right Cerebrum.Parietal Lobe.Inferior Parietal Lobule.Gray Matter.Brodmann area 40 |
| 5         | 4312   | -39.27                    | -58.48 | -14.67 | 28  | -62   | 42 Right Cerebrum.Parietal Lobe.Superior Parietal Lobule.Gray Matter.Brodmann area 7  |
|           |        |                           |        |        | -40 | -56   | -16 Left Cerebrum.Temporal Lobe.Fusiform Gyrus.Gray Matter.Brodmann area 37           |
| 6         | 2552   | 31                        | -59.99 | -20.64 | -36 | -70   | -14 Left Cerebrum.Occipital Lobe.Fusiform Gyrus.Gray Matter.Brodmann area 19          |
|           |        |                           |        |        | 30  | -60   | -24 Right Cerebellum.Anterior Lobe.Culmen.Gray Matter.*                               |
| 7         | 2384   | 52.94                     | -30.81 | 5.57   | 54  | -30   | 4 Right Cerebrum.Temporal Lobe.Superior Temporal Gyrus.Gray Matter.Brodmann area 22   |
| 8         | 992    | -51.09                    | -40.35 | 10.77  | -52 | -40   | 14 Left Cerebrum.Temporal Lobe.Superior Temporal Gyrus.Gray Matter.Brodmann area 13   |
| 9         | 632    | -23.5                     | -60.46 | -28.11 | -24 | -62   | -30 Left Cerebellum.Posterior Lobe.Pyramis.Gray Matter.*                              |

ALE MAPS WERE COMPUTED AT AN FDR-CORRECTED THRESHOLD OF  $P < 0.05$ ; MINIMUM CLUSTER DIMENSION  $K > 100\text{MM}^3$

TAB S5 ALE CLUSTERS RELATIVE TO THE CLUSTER 2 LEFT

| Cluster # | Volume (m | Weighted Center (x,y,z)                                                                | x      | y     | z   | Label |                                                                                      |        |       |    |     |                                                                                |
|-----------|-----------|----------------------------------------------------------------------------------------|--------|-------|-----|-------|--------------------------------------------------------------------------------------|--------|-------|----|-----|--------------------------------------------------------------------------------|
| 1         | 23664     | -35.7                                                                                  | -16.5  | 11.37 | -36 | -18   | 12 Left Cerebrum.Sub-lobar.Insula.Gray Matter.Brodmann area 13                       |        |       |    |     |                                                                                |
|           |           |                                                                                        |        |       | -14 | -4    | 14 Left Cerebrum.Sub-lobar.Thalamus.Gray Matter.Ventral Anterior Nucleus             |        |       |    |     |                                                                                |
|           |           |                                                                                        |        |       | -60 | -28   | 18 Left Cerebrum.Parietal Lobe.Postcentral Gyrus.Gray Matter.Brodmann area 40        |        |       |    |     |                                                                                |
|           |           |                                                                                        |        |       | -56 | -2    | 10 Left Cerebrum.Frontal Lobe.Precentral Gyrus.Gray Matter.Brodmann area 6           |        |       |    |     |                                                                                |
|           |           |                                                                                        |        |       | -12 | -16   | 8 Left Cerebrum.Sub-lobar.Thalamus.Gray Matter.*                                     |        |       |    |     |                                                                                |
|           |           |                                                                                        |        |       | -36 | 2     | 10 Left Cerebrum.Sub-lobar.Insula.Gray Matter.Brodmann area 13                       |        |       |    |     |                                                                                |
|           |           |                                                                                        |        |       | -52 | -26   | 32 Left Cerebrum.Parietal Lobe.Inferior Parietal Lobule.Gray Matter.Brodmann area 40 |        |       |    |     |                                                                                |
|           |           |                                                                                        |        |       | -52 | -20   | 10 Left Cerebrum.Temporal Lobe.Superior Temporal Gyrus.Gray Matter.Brodmann area 41  |        |       |    |     |                                                                                |
|           |           |                                                                                        |        |       | -46 | -28   | 22 Left Cerebrum.Sub-lobar.Insula.Gray Matter.Brodmann area 13                       |        |       |    |     |                                                                                |
|           |           |                                                                                        |        |       | -54 | -16   | 24 Left Cerebrum.Parietal Lobe.Postcentral Gyrus.Gray Matter.Brodmann area 3         |        |       |    |     |                                                                                |
|           |           |                                                                                        |        |       | 2   | 9104  | 45.63                                                                                | -22.69 | 15.08 | 34 | -18 | 14 Right Cerebrum.Sub-lobar.Clastrum.Gray Matter.*                             |
|           |           |                                                                                        |        |       |     |       |                                                                                      |        |       | 52 | -26 | 14 Right Cerebrum.Parietal Lobe.Postcentral Gyrus.Gray Matter.Brodmann area 40 |
|           |           |                                                                                        |        |       |     |       |                                                                                      |        |       | 48 | -28 | 20 Right Cerebrum.Sub-lobar.Insula.Gray Matter.Brodmann area 13                |
| 42        | -18       | 8 Right Cerebrum.Sub-lobar.Insula.Gray Matter.Brodmann area 13                         |        |       |     |       |                                                                                      |        |       |    |     |                                                                                |
| 58        | -16       | 10 Right Cerebrum.Temporal Lobe.Transverse Temporal Gyrus.Gray Matter.Brodmann area 42 |        |       |     |       |                                                                                      |        |       |    |     |                                                                                |
| 48        | -8        | 10 Right Cerebrum.Frontal Lobe.Precentral Gyrus.Gray Matter.Brodmann area 6            |        |       |     |       |                                                                                      |        |       |    |     |                                                                                |
| 3         | 2952      | 10.32                                                                                  | -18.2  | 7.51  |     |       |                                                                                      |        |       | 8  | -16 | 10 Right Cerebrum.Sub-lobar.Thalamus.Gray Matter.Medial Dorsal Nucleus         |
|           |           |                                                                                        |        |       | 12  | -28   | 0 Right Cerebrum.Sub-lobar.Thalamus.Gray Matter.*                                    |        |       |    |     |                                                                                |
| 4         | 456       | 5.17                                                                                   | -58.28 | -9.6  | 6   | -58   | -10 Right Cerebellum.Anterior Lobe.Culmen.Gray Matter.*                              |        |       |    |     |                                                                                |
| 5         | 312       | 11.84                                                                                  | -26.34 | 42.44 | 12  | -26   | 42 Right Cerebrum.Limbic Lobe.Cingulate Gyrus.Gray Matter.Brodmann area 31           |        |       |    |     |                                                                                |
| 6         | 280       | 3.68                                                                                   | -9.79  | 46.37 | 4   | -10   | 46 Right Cerebrum.Frontal Lobe.Paracentral Lobule.Gray Matter.Brodmann area 31       |        |       |    |     |                                                                                |
| 7         | 264       | -37.46                                                                                 | 28.07  | 23.26 | -38 | 30    | 20 Left Cerebrum.Frontal Lobe.Middle Frontal Gyrus.Gray Matter.Brodmann area 46      |        |       |    |     |                                                                                |
|           |           |                                                                                        |        |       | -36 | 26    | 26 Left Cerebrum.Frontal Lobe.Middle Frontal Gyrus.Gray Matter.Brodmann area 9       |        |       |    |     |                                                                                |
| 8         | 240       | -25.83                                                                                 | -15.11 | 53.84 | -26 | -16   | 54 Left Cerebrum.Frontal Lobe.Precentral Gyrus.Gray Matter.Brodmann area 6           |        |       |    |     |                                                                                |

ALE MAPS WERE COMPUTED AT AN FDR-CORRECTED THRESHOLD OF  $P < 0.05$ ; MINIMUM CLUSTER DIMENSION  $K > 100\text{MM}^3$

## SUPPLEMENTARY FIGURES

---

FIG S1 INSULAR BLOCKS

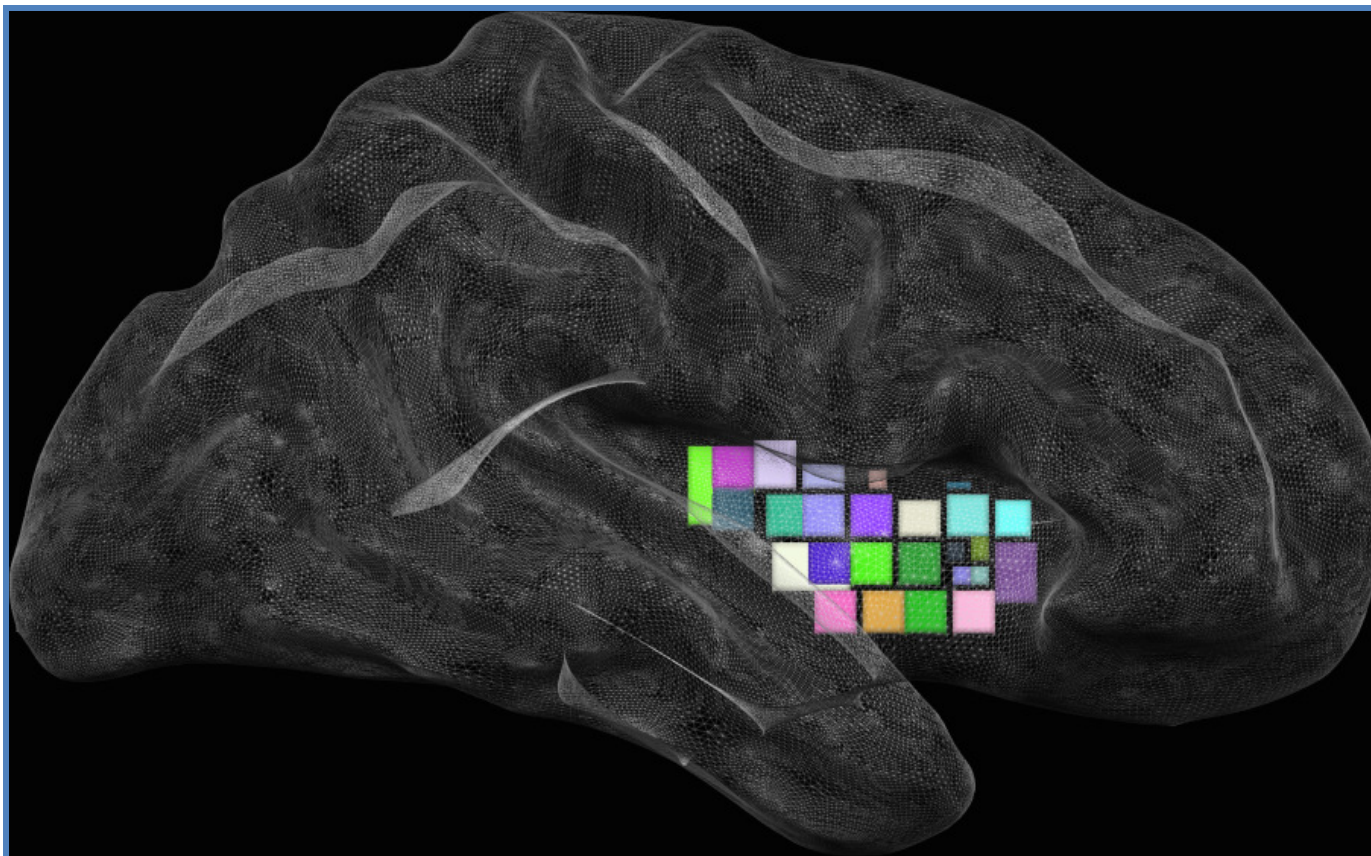

FIG S2 MACM PROFILES OF INSULAR BLOCKS

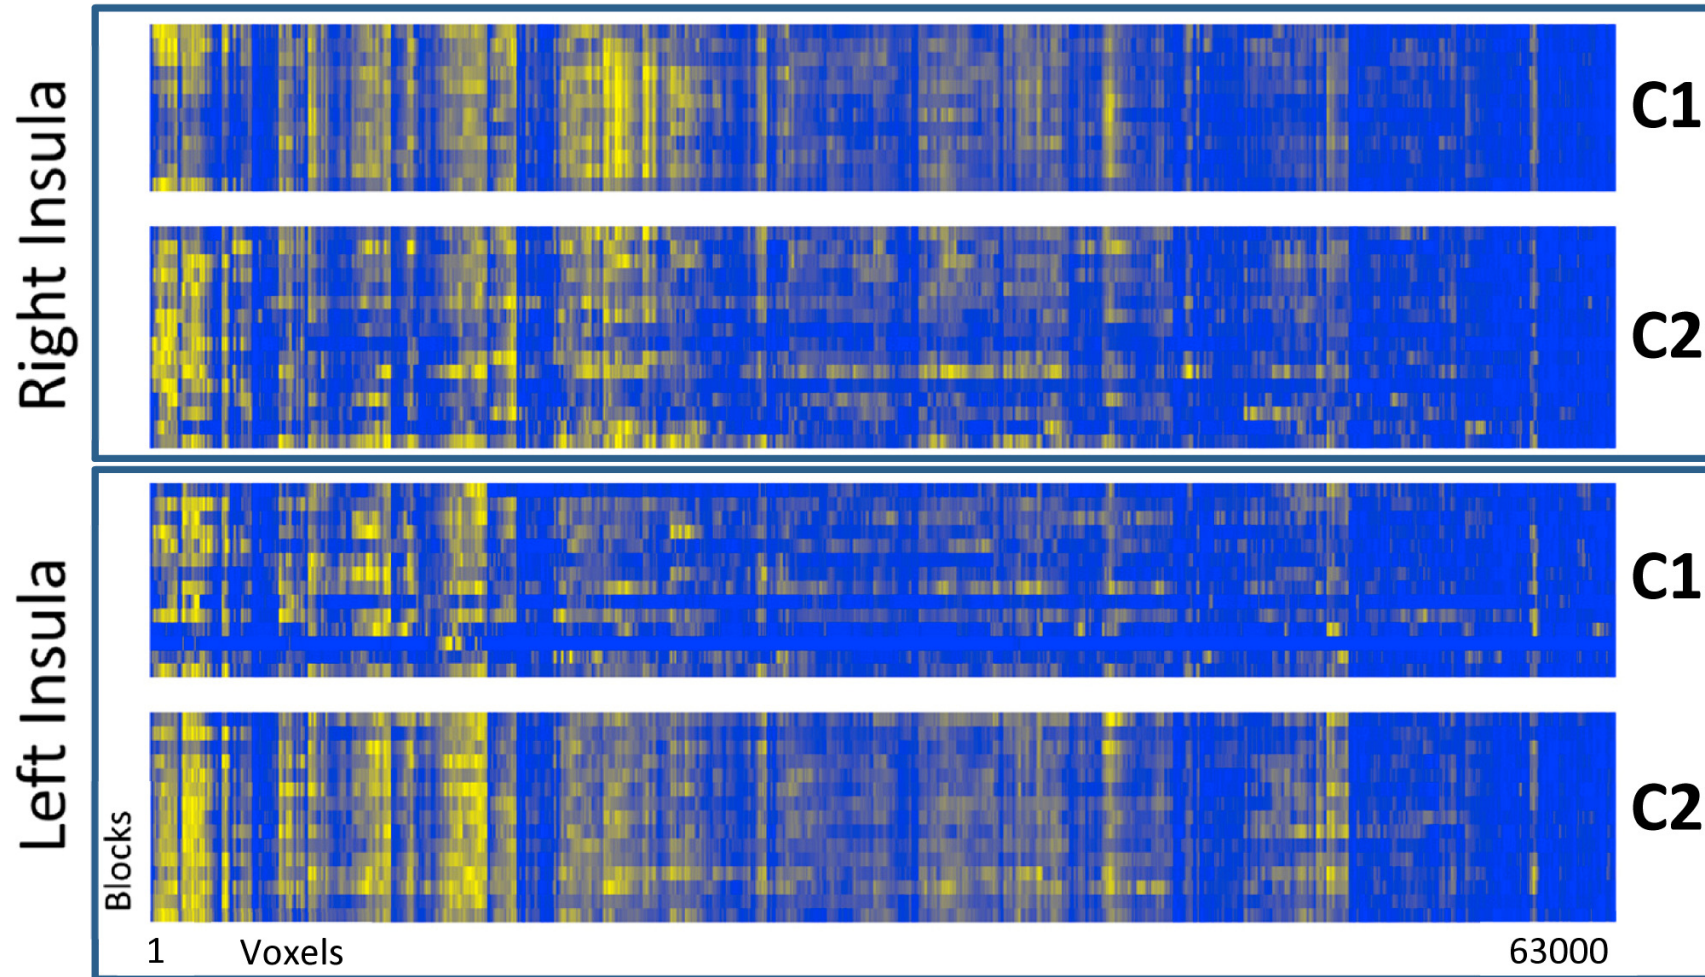

Supplement: NIHMS764336-supplement-Supplement.pdf [file NIHMS764336-supplement-Supplement.pdf]
